# Supplementary material for: Coordination behaviour of a hybrid phosphinoguanidine ligand
Source: Royal Society of Chemistry journal article supplement (doi:10.1039/d1nj05237c), 2021-12-02
Supplement: d1nj05237c1.pdf [file d1nj05237c1.pdf]

## **Coordination behaviour of a hybrid phosphinoguanidine ligand**

Zdeněk Leitner, Ivana Císařová and Petr Štěpnička\*

*Department of Inorganic Chemistry, Faculty of Science, Charles University,*

*Hlavova 2030, 128 40 Prague, Czech Republic*

## **Supporting Information**

## Optimisation of the synthesis of 2-(diphenylphosphino)aniline (**2**)

**General procedure.** An oven-dried Schlenk flask equipped with a stirring bar was charged successively with a solid catalyst ( $\text{Pd}(\text{OAc})_2$  was dosed in the form of a toluene solution containing 1 mg  $\text{Pd}(\text{OAc})_2$  per 1 mL), a base and 2-iodoaniline (438 mg, 2.0 mmol), flushed with nitrogen, and sealed with a rubber septum. Dry toluene (up to 5 mL total volume) was introduced, followed by neat diphenylphosphine (348  $\mu\text{L}$ , 2.0 mmol) and amine additive. The reaction vessel was transferred to a preheated oil bath and stirred at constant temperature for the given reaction time. Conversion was determined by integrating the  $^1\text{H}$  NMR spectra of small aliquots withdrawn from a cooled reaction mixture and diluted with  $\text{dms}\text{-d}_6$ . The results are outlined in Table S1.

**Table S1** Summary of the catalytic experiments<sup>a</sup>

| Entry           | T/°C       | Time/h    | Catalyst [mol.%]                                 | Base [equiv.]                                  | Amine [mol.%] <sup>c</sup>                    | NMR yield/% |
|-----------------|------------|-----------|--------------------------------------------------|------------------------------------------------|-----------------------------------------------|-------------|
| 1               | 110        | 24        | $\text{Pd}(\text{OAc})_2$ [0.1]/CuI [5]          | $\text{Cs}_2\text{CO}_3$ [2]                   | DMEDA [35]                                    | >99         |
| 2               | 110        | 24        | $\text{Pd}(\text{OAc})_2$ [0.1]/CuI [ <b>2</b> ] | $\text{Cs}_2\text{CO}_3$ [ <b>1</b> ]          | DMEDA [ <b>10</b> ]                           | >99         |
| 3               | 110        | 24        | $\text{Pd}(\text{OAc})_2$ [0.1]/CuI [2]          | <b><math>\text{K}_2\text{CO}_3</math></b> [1]  | DMEDA [10]                                    | >99         |
| 4               | 110        | 24        | <b>CuI</b> [2]                                   | $\text{K}_2\text{CO}_3$ [1]                    | DMEDA [10]                                    | 9           |
| 5               | 110        | 24        | $\text{Pd}(\text{OAc})_2$ [1]                    | $\text{Cs}_2\text{CO}_3$ [2]                   | DMEDA [35]                                    | >99         |
| 6               | 110        | 24        | $\text{Pd}(\text{OAc})_2$ [ <b>0.1</b> ]         | $\text{Cs}_2\text{CO}_3$ [ <b>1</b> ]          | DMEDA [ <b>10</b> ]                           | >99         |
| 7               | 110        | 24        | $\text{Pd}(\text{OAc})_2$ [0.1]                  | <b><math>\text{K}_2\text{CO}_3</math></b> [1]  | DMEDA [10]                                    | >99         |
| 8               | 110        | 24        | $\text{Pd}(\text{OAc})_2$ [0.1]                  | $\text{K}_2\text{CO}_3$ [1]                    | DMEDA [ <b>5</b> ]                            | 97          |
| 9               | 110        | 24        | $\text{Pd}(\text{OAc})_2$ [0.1]                  | $\text{K}_2\text{CO}_3$ [1]                    | <b><math>\text{Et}_2\text{NH}</math></b> [10] | 59          |
| 10              | 110        | 24        | $\text{Pd}(\text{OAc})_2$ [0.1]                  | $\text{K}_2\text{CO}_3$ [1]                    | <b><math>\text{Et}_3\text{N}</math></b> [10]  | 68          |
| 11              | 110        | 24        | $\text{Pd}(\text{OAc})_2$ [ <b>0.5</b> ]         | <b><math>\text{Cs}_2\text{CO}_3</math></b> [1] | <b>none</b>                                   | 40          |
| 12              | 110        | <b>4</b>  | $\text{Pd}(\text{OAc})_2$ [0.1]                  | $\text{K}_2\text{CO}_3$ [1]                    | DMEDA [10]                                    | >99         |
| 13              | 110        | <b>2</b>  | $\text{Pd}(\text{OAc})_2$ [0.1]                  | $\text{K}_2\text{CO}_3$ [1]                    | DMEDA [10]                                    | >99         |
| 14              | <b>100</b> | 2         | $\text{Pd}(\text{OAc})_2$ [0.1]                  | $\text{K}_2\text{CO}_3$ [1]                    | DMEDA [10]                                    | 45          |
| 15              | 100        | <b>12</b> | $\text{Pd}(\text{OAc})_2$ [0.1]                  | $\text{K}_2\text{CO}_3$ [1]                    | DMEDA [10]                                    | >99         |
| 16              | <b>90</b>  | 2         | $\text{Pd}(\text{OAc})_2$ [0.1]                  | $\text{K}_2\text{CO}_3$ [1]                    | DMEDA [10]                                    | 0           |
| 17 <sup>b</sup> | 100        | 12        | $\text{Pd}(\text{OAc})_2$ [0.1]                  | $\text{K}_2\text{CO}_3$ [1]                    | DMEDA [10]                                    | 0           |

<sup>a</sup> The change from a previous entry is highlighted in bold. <sup>b</sup> DMEDA = *N,N'*-dimethylethylenediamine. <sup>c</sup> Reaction using 2-bromoaniline (2.0 mmol) as the starting material

## Additional structural diagrams

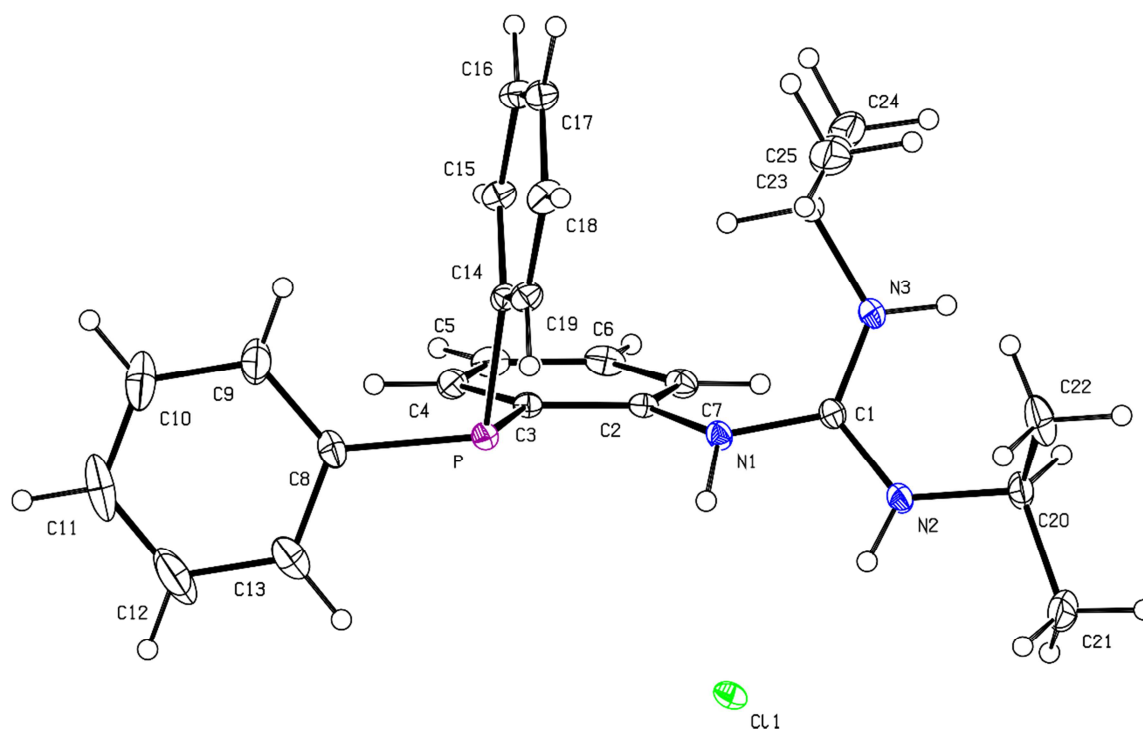

**Figure S1.** PLATON plot of the structure of (1H)Cl showing 30% probability ellipsoids

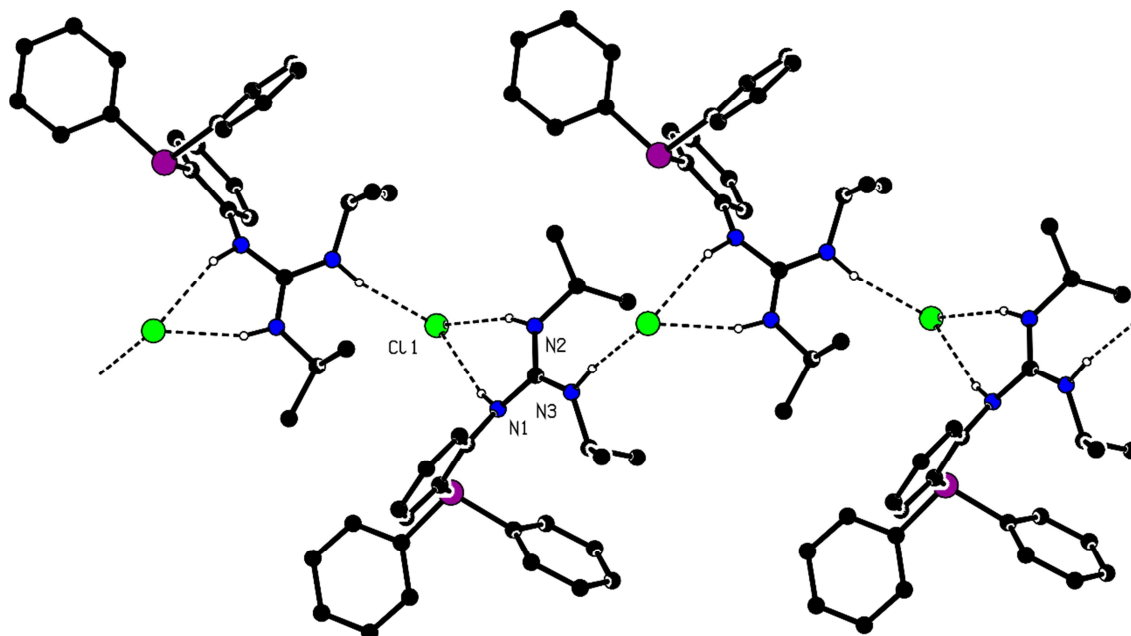

**Figure S2.** Simplified packing diagram of (1H)Cl (only NH hydrogens are shown for clarity).  
Hydrogen bond parameters: N1...Cl1 = 3.200(1) Å, N2...Cl1 = 3.133(1), N3...Cl1 = 3.175(1) Å

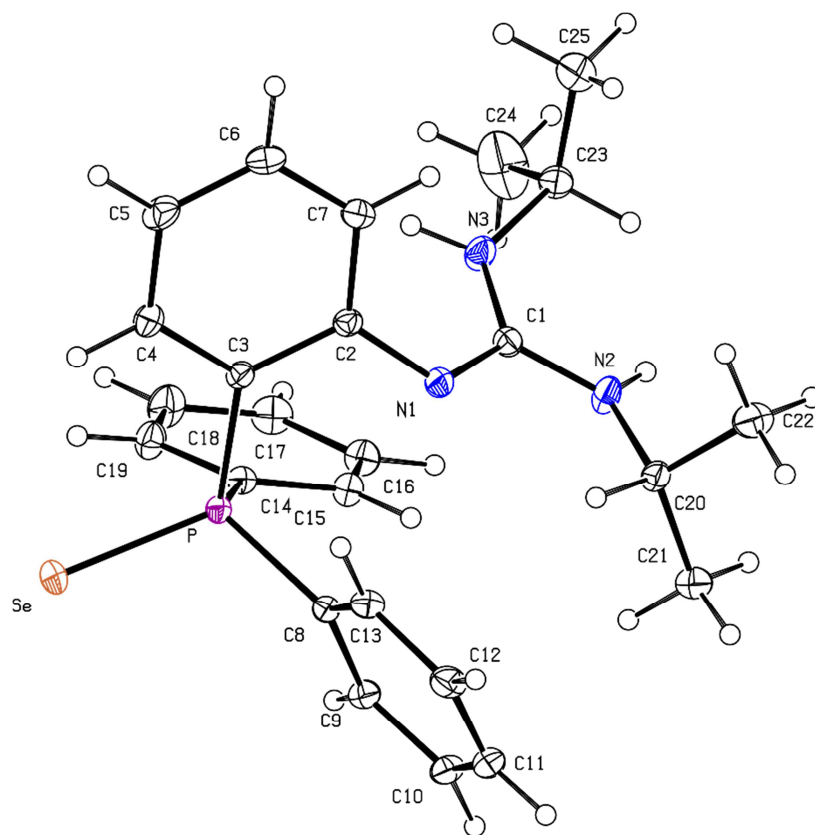

**Figure S3.** PLATON plot of the structure of **3** showing 30% probability ellipsoids

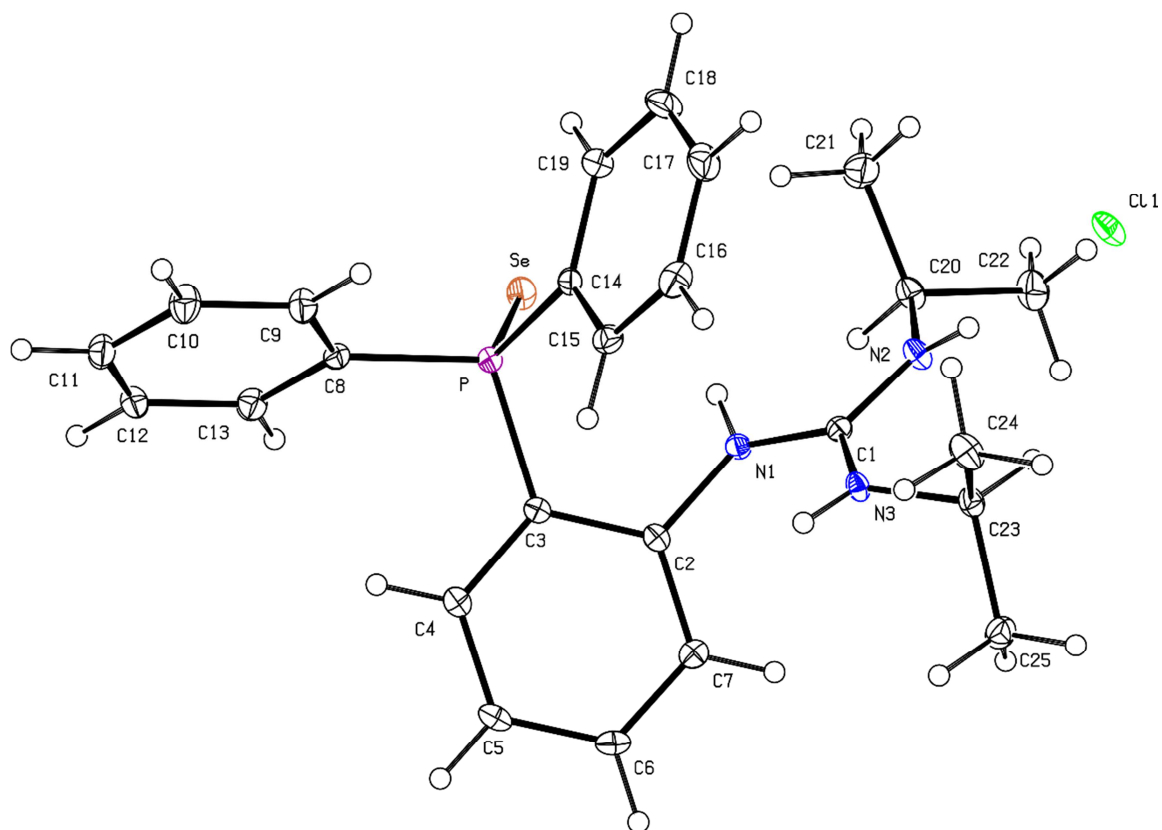

**Figure S4.** PLATON plot of the structure of **(3H)Cl** showing 30% probability ellipsoids

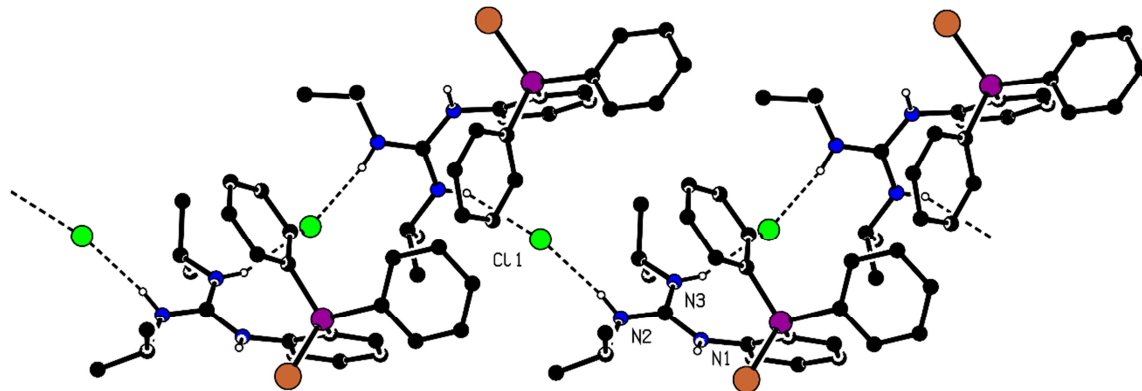

**Figure S5.** Simplified packing diagram of **(3H)Cl** (only NH hydrogens are shown for clarity). Hydrogen bond parameters:  $N1 \cdots Se = 3.450(1) \text{ \AA}$  (intramolecular; not indicated in the figure);  $N2 \cdots Cl1 = 3.139(1) \text{ \AA}$ ,  $N3 \cdots Cl1 = 3.198(1) \text{ \AA}$

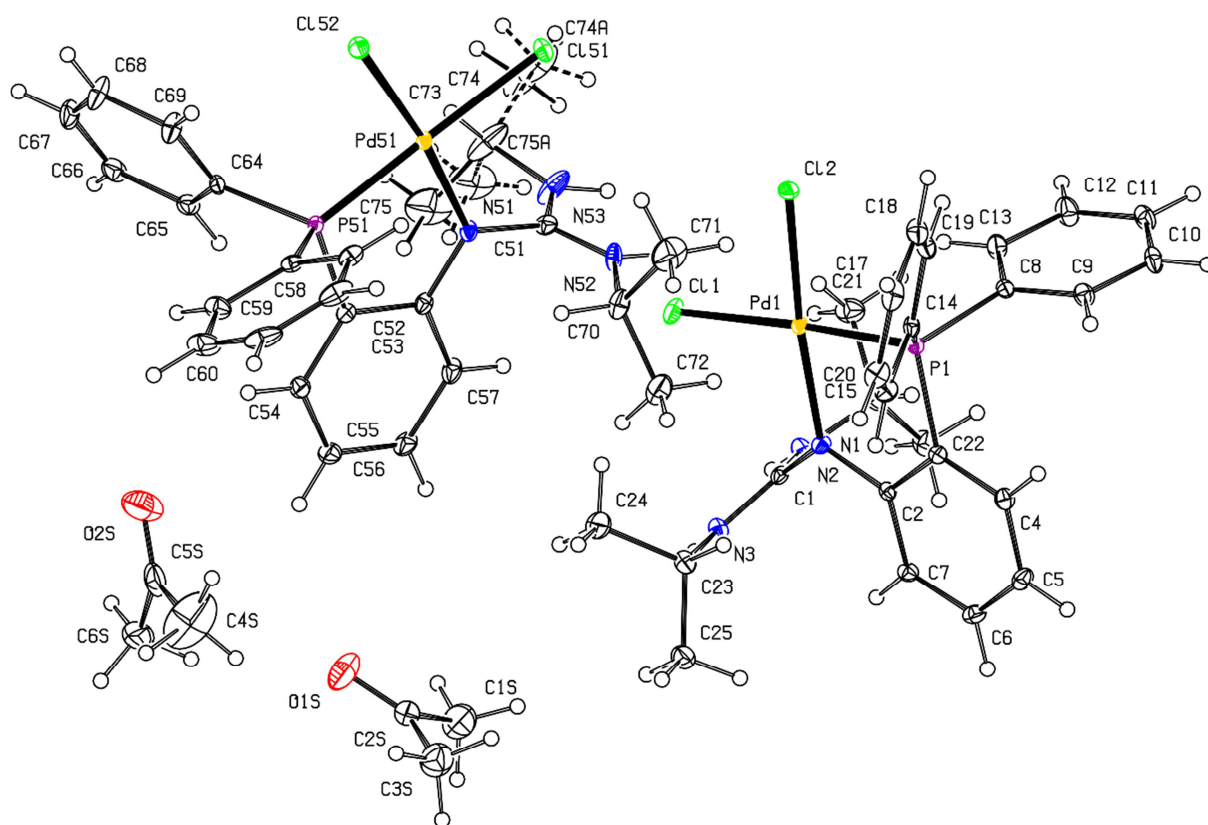

**Figure S6.** Full PLATON plot of the structure of 4·Me<sub>2</sub>CO showing 30% probability ellipsoids

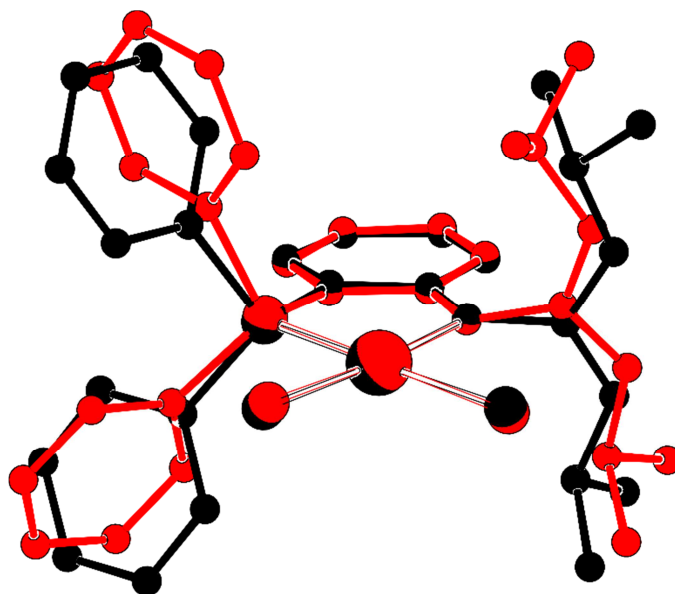

**Figure S7.** Overlap of the two crystallographically complex molecules in the structure of 4·Me<sub>2</sub>CO (molecule 1 in red, molecule 2 in black); only one position of the disordered isopropyl group is shown to avoid complicating the figure.

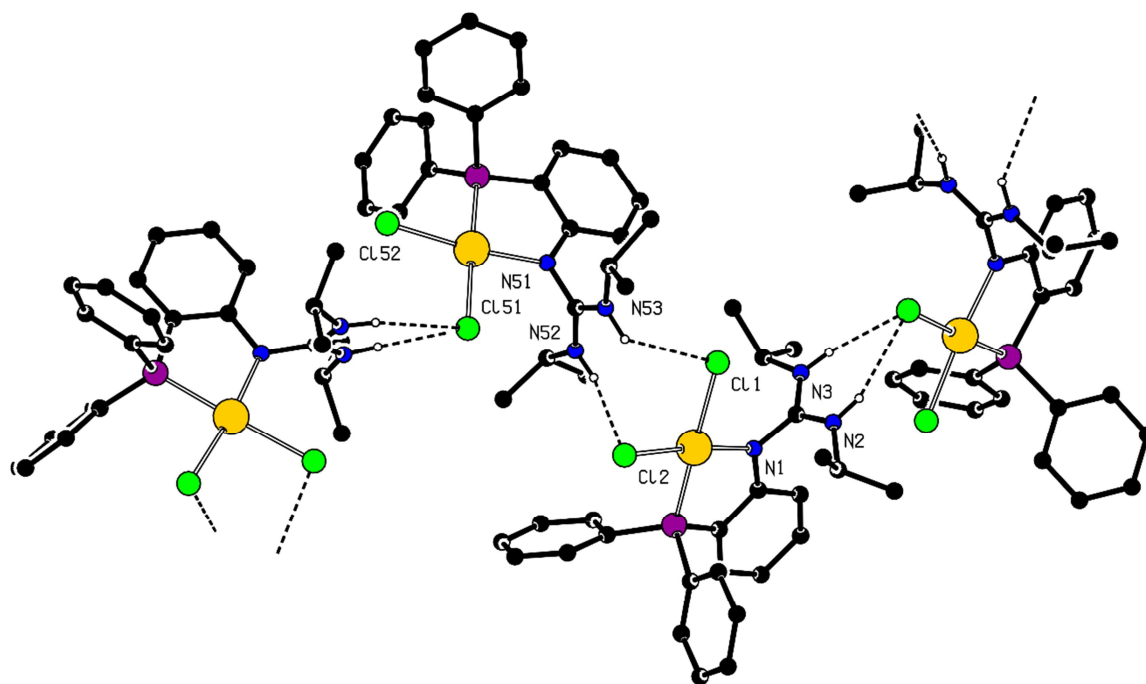

**Figure S8.** Simplified packing diagram of 4·Me<sub>2</sub>CO (only NH hydrogens and one position of the disordered isopropyl group are shown for clarity). Note that the NH groups of the molecule 1 (Pd1) form hydrogen bonds with the same chloride ligand, Cl51, in molecule 2 (Pd51), while the NH groups in molecule 2 interact with the different chlorides in molecule 1. These interactions give rise to zig-zag chains oriented along the crystallographic *c* axis. Hydrogen bond parameters: N2···Cl51 = 3.460(2) Å, N3···Cl51 = 3.305(2) Å, N52···Cl2 = 3.299(2) Å, N53···Cl1 = 3.278(2) Å

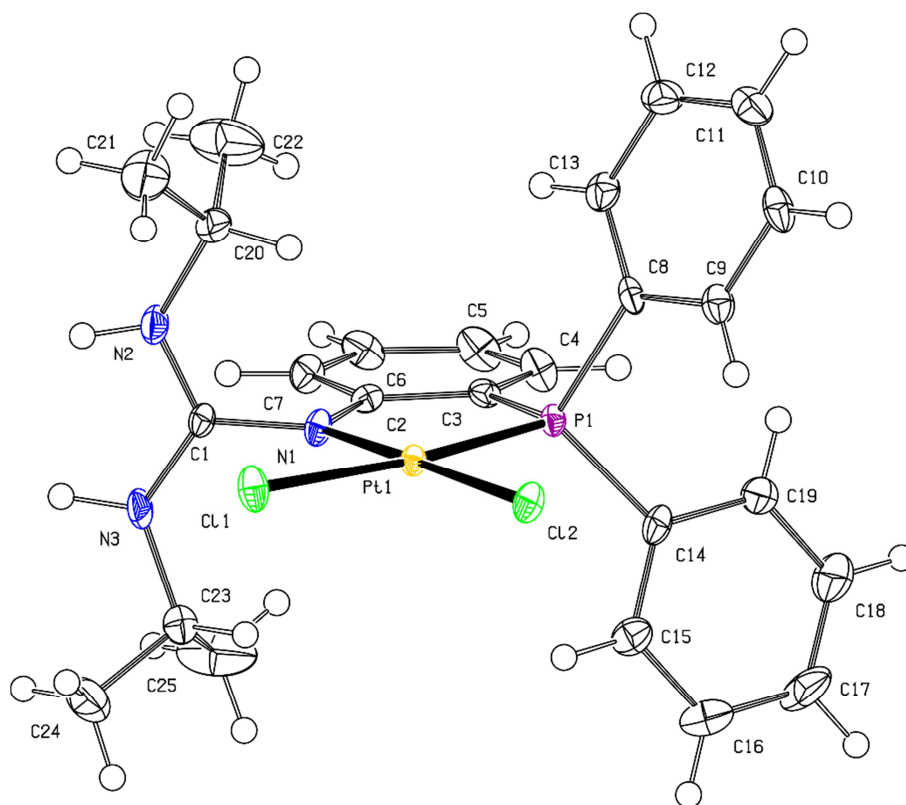

**Figure S9.** PLATON plot of the structure of **7** showing 30% probability ellipsoids

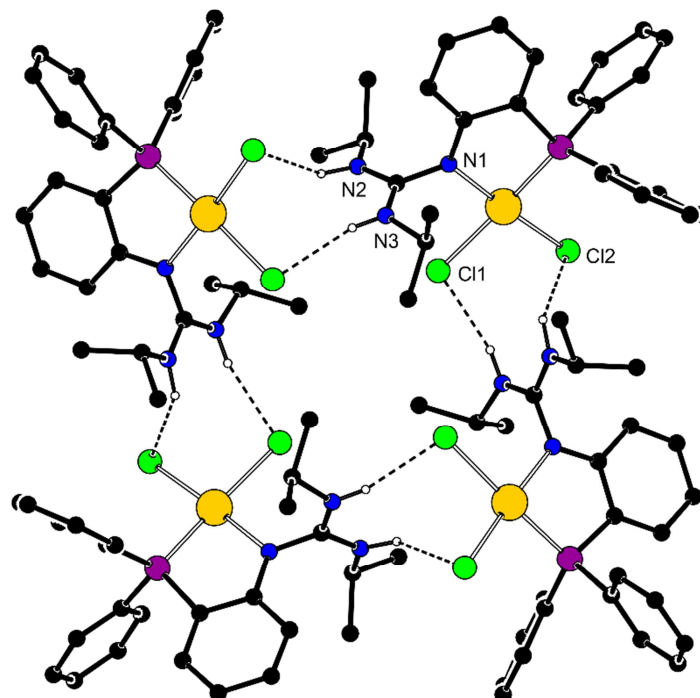

**Figure S10.** Simplified packing diagram of **7** (only NH hydrogens are shown for clarity). The complex molecules assemble into closed cyclic arrays around the crystallographic four-fold axis. Hydrogen bond parameters: N2...Cl1 = 3.250(4) Å, N3...Cl2 = 3.452(4) Å



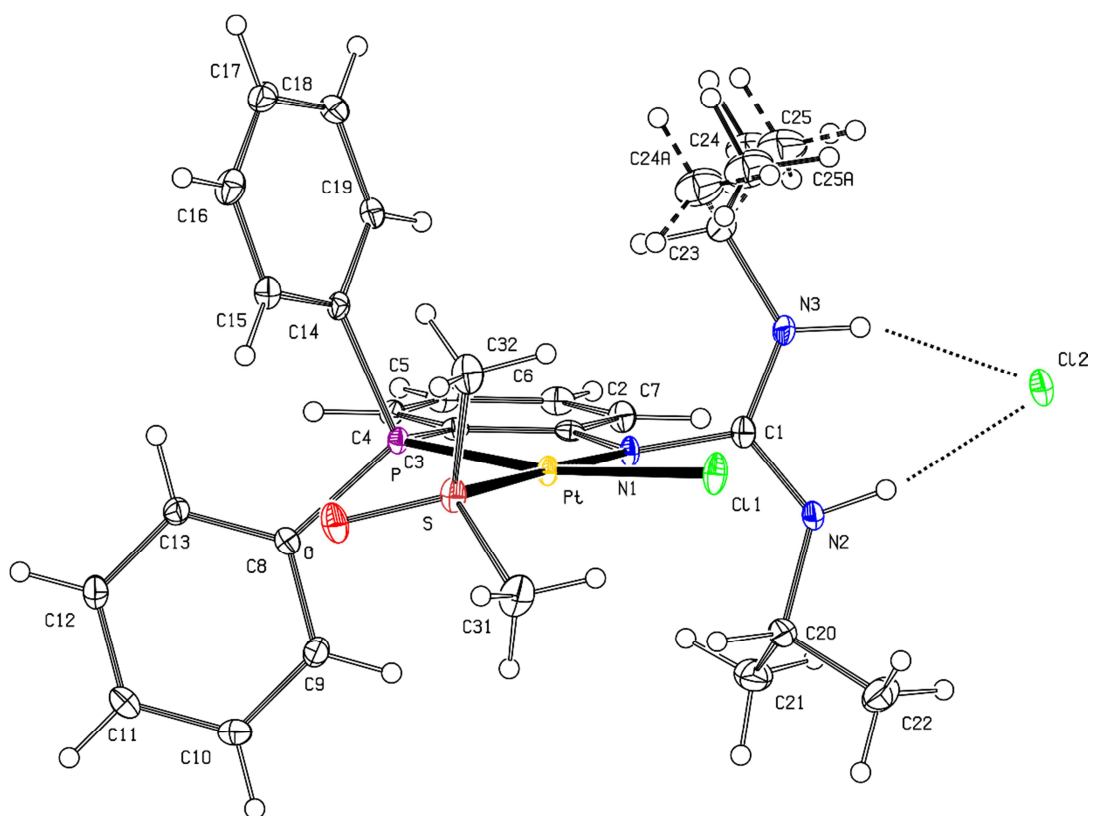

**Figure S11.** PLATON plot of the structure of **5** showing 30% probability ellipsoids; the N-H...Cl hydrogen bonds are indicated by dotted lines ( $N2\cdots Cl2 = 3.180(2)$  Å,  $N3\cdots Cl2 = 3.214(2)$  Å).

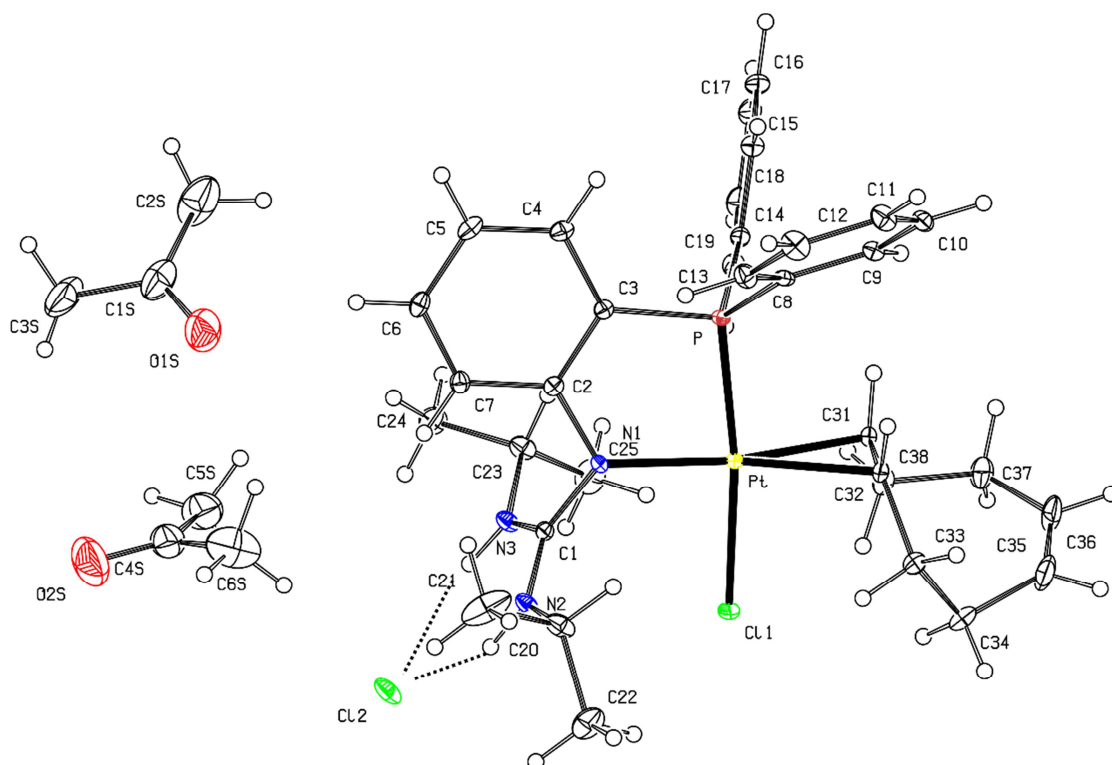

**Figure S12.** PLATON plot of the structure of **6·2Me<sub>2</sub>CO** showing 30% probability ellipsoids; the N-H...Cl hydrogen bonds are shown as dotted lines ( $N2\cdots Cl2 = 3.180(2)$  Å,  $N3\cdots Cl2 = 3.096(3)$  Å).

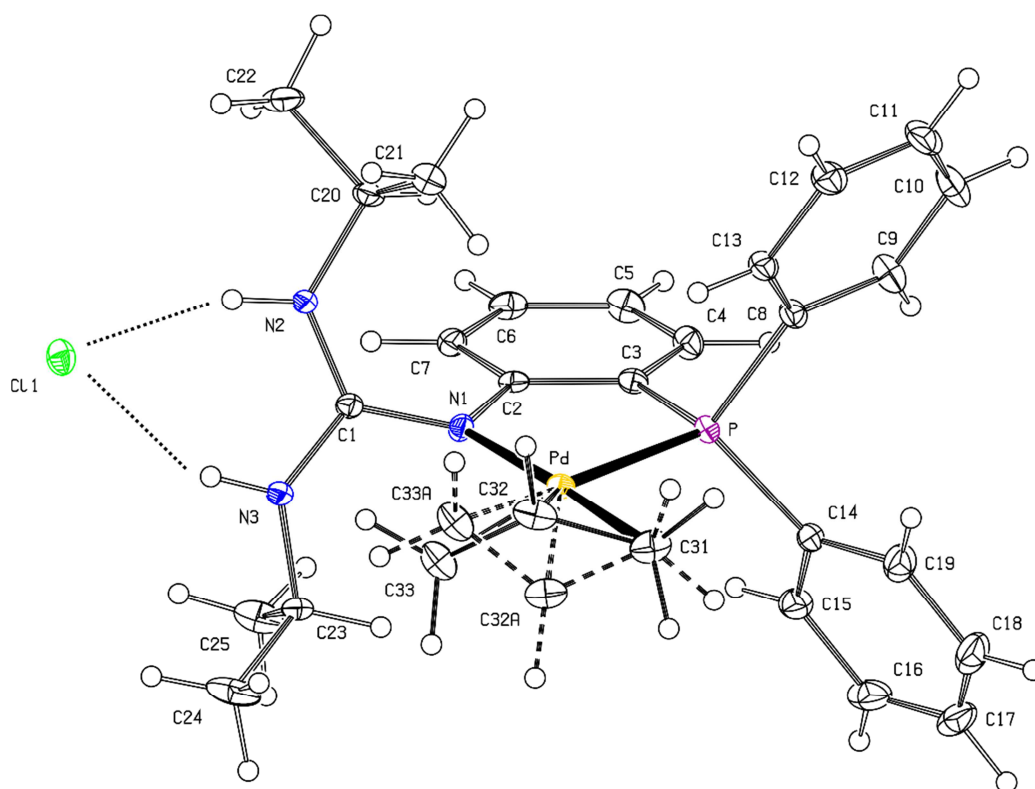

**Figure S13.** PLATON plot of the structure of **8** showing 30% probability ellipsoids. The N-H...Cl hydrogen bonds are shown as dotted lines ( $N2 \cdots Cl2 = 3.178(2) \text{ \AA}$ ,  $N3 \cdots Cl2 = 3.182(2) \text{ \AA}$ ).

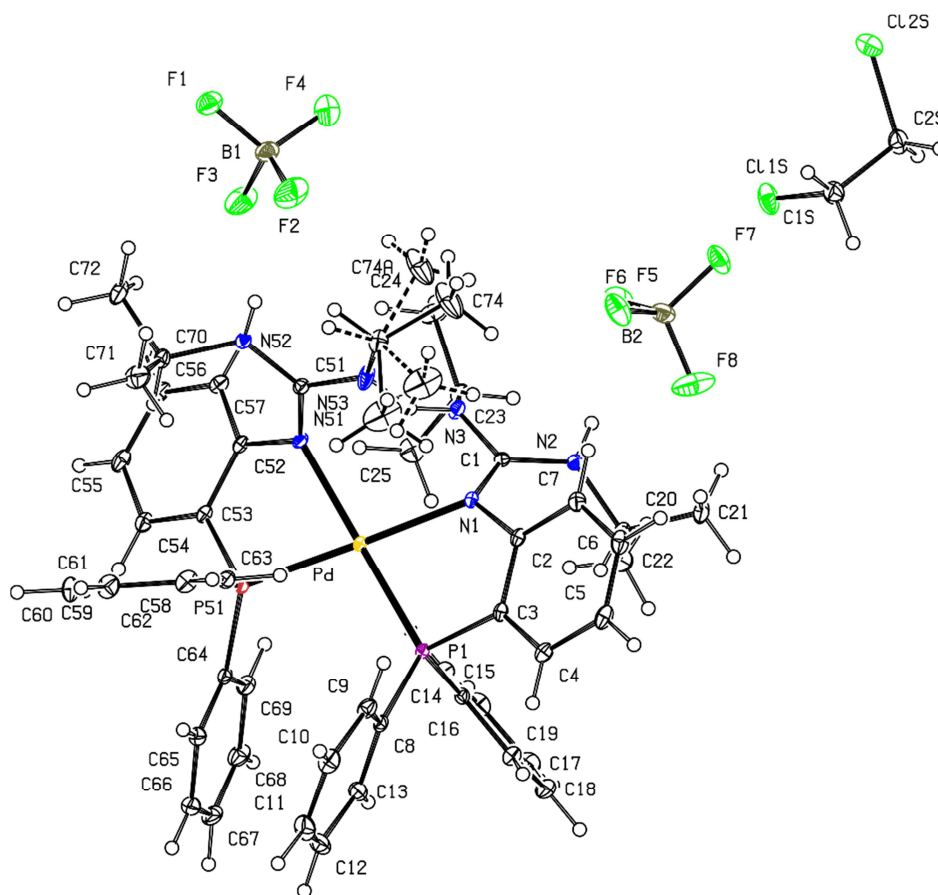

**Figure S14.** PLATON plot of the structure of **9**· $C_2H_4Cl_2$  showing 30% probability ellipsoids

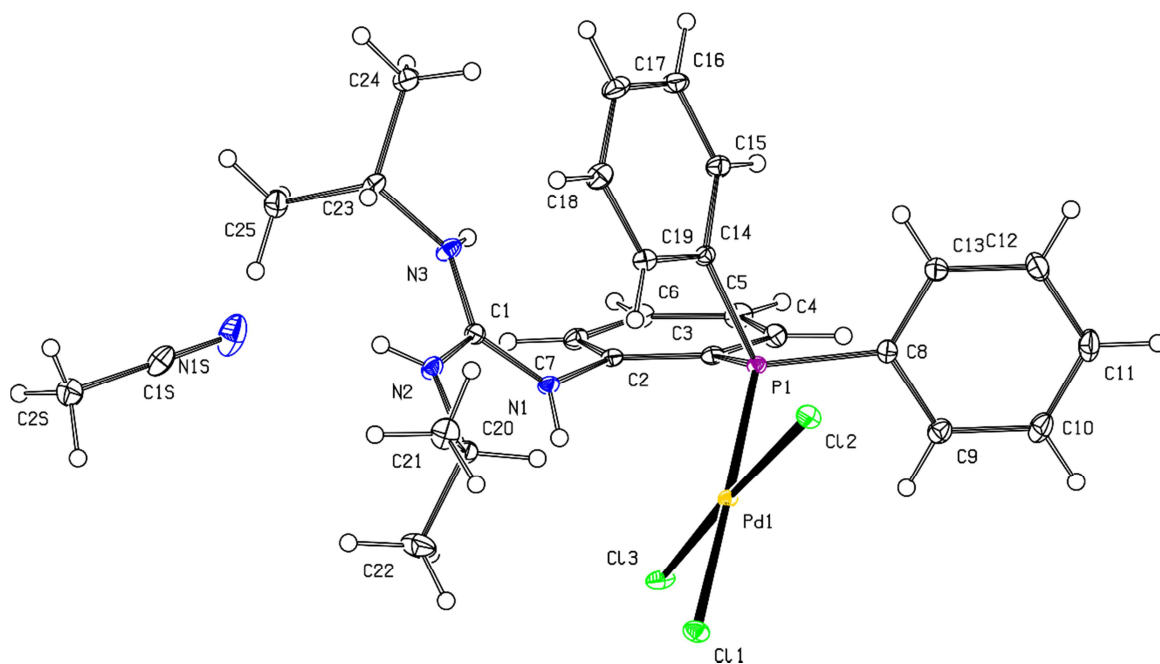

**Figure S15.** PLATON plot of the structure of **9**-MeCN showing 30% probability ellipsoids

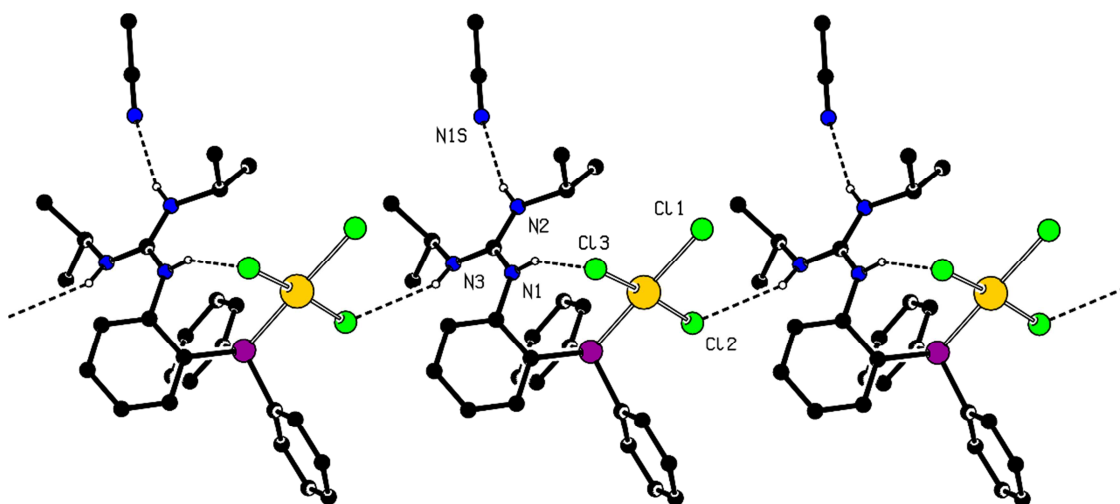

**Figure S16.** Simplified packing diagram of **10**-MeCN (only NH hydrogens are shown for clarity);  
Hydrogen bond parameters: N1...Cl3 = 3.107(1) Å, N2...N1S = 2.995(2) Å, N3...Cl3 = 3.387(1) Å

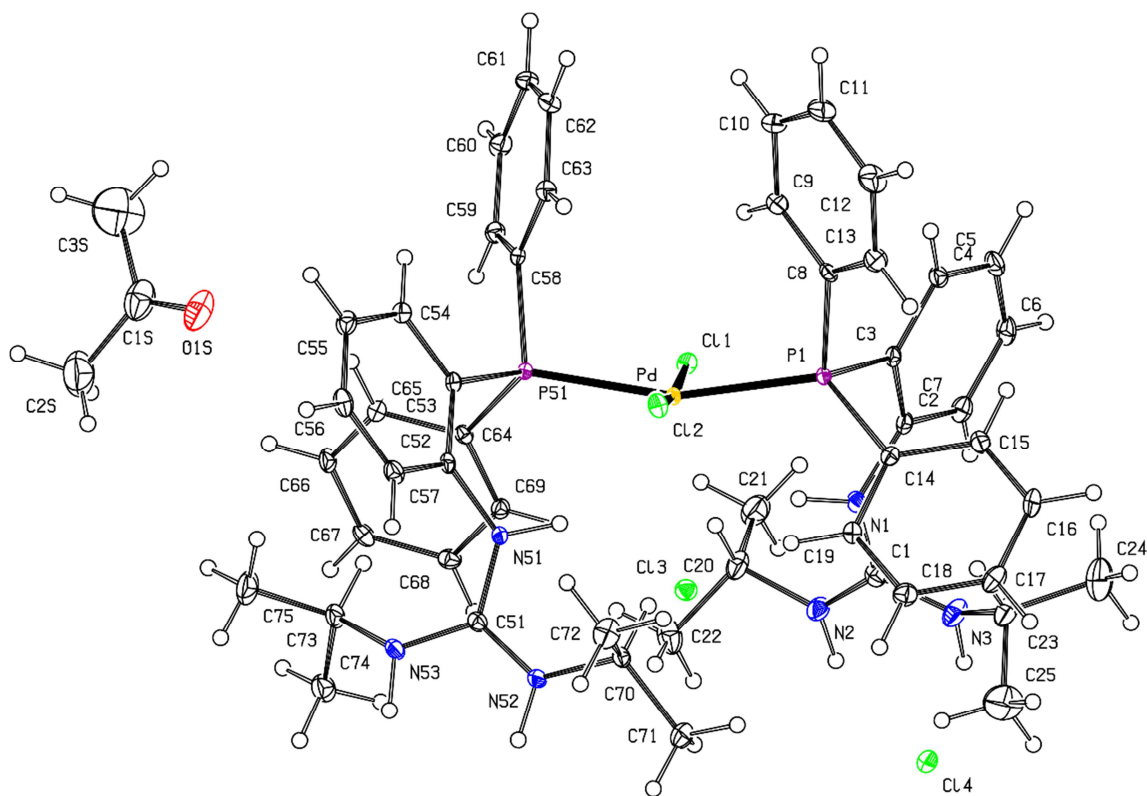

**Figure S17.** PLATON plot of the structure of **11**·Me<sub>2</sub>CO showing 30% probability ellipsoids

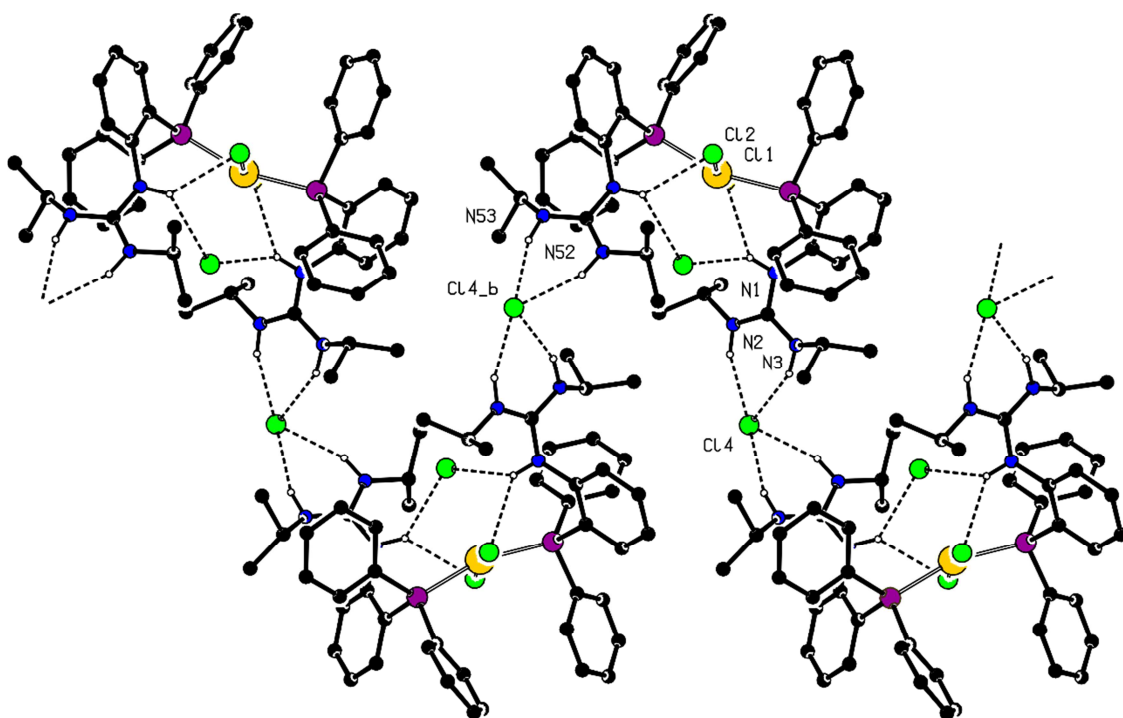

**Figure S18.** Simplified packing diagram of **11**·Me<sub>2</sub>CO (only NH hydrogens are shown for clarity); Hydrogen bond parameters: N1...Cl1 (intramolecular) = 3.337(2) Å; N1...Cl3 = 3.233(2) Å, N2...Cl4 = 3.201(2) Å, N3...Cl4 = 3.340(2) Å, N51...Cl2 (intramolecular) = 3.259(2) Å, N51...Cl3 = 3.496(2) Å, N52...Cl4 = 3.2508(2) Å, and N53...Cl4 = 3.203(2) Å

**Table S2.** Selected crystallographic data and structure refinement parameters<sup>a</sup>

| Compound                                       | (1H)Cl                                                                      | 3                                                  | (3H)Cl                                               |
|------------------------------------------------|-----------------------------------------------------------------------------|----------------------------------------------------|------------------------------------------------------|
| Formula                                        | C <sub>25</sub> H <sub>31</sub> ClN <sub>3</sub> P                          | C <sub>25</sub> H <sub>30</sub> N <sub>3</sub> PSe | C <sub>25</sub> H <sub>31</sub> ClN <sub>3</sub> PSe |
| <i>M</i>                                       | 439.95                                                                      | 482.45                                             | 518.91                                               |
| <i>T</i> [K]                                   | 130(2)                                                                      | 150(2)                                             | 120(2)                                               |
| Crystal system                                 | orthorhombic                                                                | monoclinic                                         | orthorhombic                                         |
| Space group                                    | <i>P</i> 2 <sub>1</sub> 2 <sub>1</sub> 2 <sub>1</sub> (no. 19) <sup>c</sup> | <i>P</i> 2 <sub>1</sub> / <i>c</i> (no. 14).       | <i>Pbca</i> (no. 61)                                 |
| <i>a</i> [Å]                                   | 10.1489(4)                                                                  | 14.1735(4)                                         | 11.1802(2)                                           |
| <i>b</i> [Å]                                   | 12.9048(4)                                                                  | 9.6026(3)                                          | 13.5729(2)                                           |
| <i>c</i> [Å]                                   | 19.8932(8)                                                                  | 17.3982(5)                                         | 33.3512(7)                                           |
| $\alpha$ [°]                                   | 90                                                                          | 90                                                 | 90                                                   |
| $\beta$ [°]                                    | 90                                                                          | 96.210(1)                                          | 90                                                   |
| $\gamma$ [°]                                   | 90                                                                          | 90                                                 | 90                                                   |
| <i>V</i> [Å <sup>3</sup> ]                     | 2605.4(2)                                                                   | 2354.0(1)                                          | 5061.0(2)                                            |
| <i>Z</i>                                       | 4                                                                           | 4                                                  | 8                                                    |
| $\mu$ (Mo K $\alpha$ ) [mm <sup>-1</sup> ]     | 0.223                                                                       | 1.680                                              | 1.670                                                |
| Diffns collected                               | 26308                                                                       | 60794                                              | 43114                                                |
| Independent diffns                             | 5970                                                                        | 6856                                               | 5797                                                 |
| Observed <sup>a</sup> diffns                   | 5772                                                                        | 6451                                               | 5070                                                 |
| <i>R</i> <sub>int</sub> <sup>b</sup> [%]       | 2.12                                                                        | 2.09                                               | 3.70                                                 |
| No. of parameters                              | 276                                                                         | 275                                                | 284                                                  |
| <i>R</i> <sup>b</sup> obsd diffns [%]          | 2.42                                                                        | 2.74                                               | 2.50                                                 |
| <i>R</i> , <i>wR</i> <sup>b</sup> all data [%] | 2.57, 5.99                                                                  | 2.95, 6.82                                         | 3.14, 6.24                                           |
| $\Delta\rho$ [e Å <sup>-3</sup> ]              | 0.19, -0.15                                                                 | 0.76, -0.49                                        | 0.33, -0.31                                          |
| CCDC deposition no.                            | 2119578                                                                     | 2119579                                            | 2119580                                              |

<sup>a</sup> Diffractions with  $I > 2\sigma(I)$ . <sup>b</sup> Definitions:  $R_{\text{int}} = \Sigma |F_o^2 - F_o^2(\text{mean})| / \Sigma F_o^2$ , where  $F_o^2(\text{mean})$  is the average intensity of symmetry-equivalent diffractions.  $R = \Sigma ||F_o| - |F_c|| / \Sigma |F_o|$ ,  $wR = [\Sigma \{w(F_o^2 - F_c^2)^2\} / \Sigma w(F_o^2)^2]^{1/2}$ . <sup>c</sup> Flack's enantiomorph parameter: -0.02(1).

**Table S2 continued**

| Compound                                       | 4·Me <sub>2</sub> CO                                                | 5                                                                    | 6·2Me <sub>2</sub> CO                                                             |
|------------------------------------------------|---------------------------------------------------------------------|----------------------------------------------------------------------|-----------------------------------------------------------------------------------|
| Formula                                        | C <sub>28</sub> H <sub>36</sub> Cl <sub>2</sub> N <sub>3</sub> OPPd | C <sub>27</sub> H <sub>36</sub> Cl <sub>2</sub> N <sub>3</sub> OPPtS | C <sub>39</sub> H <sub>54</sub> Cl <sub>2</sub> N <sub>3</sub> O <sub>2</sub> PPt |
| <i>M</i>                                       | 638.87                                                              | 747.61                                                               | 893.81                                                                            |
| <i>T</i> [K]                                   | 120(2)                                                              | 120(2)                                                               | 120(2)                                                                            |
| Crystal system                                 | monoclinic                                                          | monoclinic                                                           | monoclinic                                                                        |
| Space group                                    | <i>P</i> 2 <sub>1</sub> / <i>c</i> (no. 14)                         | <i>P</i> 2 <sub>1</sub> / <i>c</i> (no. 14)                          | <i>P</i> 2 <sub>1</sub> / <i>n</i> (no. 14)                                       |
| <i>a</i> [Å]                                   | 8.5730(5)                                                           | 13.5803(2)                                                           | 10.7829(5)                                                                        |
| <i>b</i> [Å]                                   | 32.934(2)                                                           | 10.3485(2)                                                           | 27.718(2)                                                                         |
| <i>c</i> [Å]                                   | 21.093(1)                                                           | 21.2730(4)                                                           | 13.6704(7)                                                                        |
| $\alpha$ [°]                                   | 90                                                                  | 90                                                                   | 90                                                                                |
| $\beta$ [°]                                    | 96.416(3)                                                           | 96.195(1)                                                            | 94.110(2)                                                                         |
| $\gamma$ [°]                                   | 90                                                                  | 90                                                                   | 90                                                                                |
| <i>V</i> [Å <sup>3</sup> ]                     | 5918.1(7)                                                           | 2972.16(9)                                                           | 4075.2(4)                                                                         |
| <i>Z</i>                                       | 8                                                                   | 4                                                                    | 4                                                                                 |
| $\mu$ (Mo K $\alpha$ ) [mm <sup>-1</sup> ]     | 0.887                                                               | 5.050                                                                | 3.649                                                                             |
| Diffns collected                               | 108792                                                              | 20069                                                                | 67396                                                                             |
| Independent diffns                             | 13609                                                               | 6828                                                                 | 9374                                                                              |
| Observed <sup>a</sup> diffns                   | 11895                                                               | 5928                                                                 | 8089                                                                              |
| <i>R</i> <sub>int</sub> <sup>b</sup> [%]       | 3.27                                                                | 2.39                                                                 | 4.12                                                                              |
| No. of parameters                              | 670                                                                 | 340                                                                  | 441                                                                               |
| <i>R</i> <sup>b</sup> obsd diffns [%]          | 2.24                                                                | 2.03                                                                 | 2.33                                                                              |
| <i>R</i> , <i>wR</i> <sup>b</sup> all data [%] | 2.96, 5.18                                                          | 2.65, 4.37                                                           | 3.19, 5.36                                                                        |
| $\Delta\rho$ [e Å <sup>-3</sup> ]              | 0.81, -0.64                                                         | 0.84, -0.58                                                          | 1.52, -0.68                                                                       |
| CCDC deposition no.                            | 2119581                                                             | 2119582                                                              | 2119583                                                                           |

**Table S2 continued**

| Compound                                       | 7·0.4CH <sub>2</sub> Cl <sub>2</sub>                                     | 8                                                    | 9·C <sub>2</sub> H <sub>4</sub> Cl <sub>2</sub>                                                                |
|------------------------------------------------|--------------------------------------------------------------------------|------------------------------------------------------|----------------------------------------------------------------------------------------------------------------|
| Formula                                        | C <sub>25.4</sub> H <sub>30.8</sub> Cl <sub>2.8</sub> N <sub>3</sub> PPt | C <sub>28</sub> H <sub>35</sub> ClN <sub>3</sub> PPd | C <sub>52</sub> H <sub>64</sub> B <sub>2</sub> Cl <sub>2</sub> F <sub>8</sub> N <sub>6</sub> P <sub>2</sub> Pd |
| <i>M</i>                                       | 703.45                                                                   | 586.41                                               | 1185.95                                                                                                        |
| <i>T</i> [K]                                   | 120(2)                                                                   | 120(2)                                               | 120(2)                                                                                                         |
| Crystal system                                 | tetragonal                                                               | monoclinic                                           | monoclinic                                                                                                     |
| Space group                                    | <i>P4/n</i> (no. 85)                                                     | <i>P2<sub>1</sub>/c</i> (no. 14)                     | <i>P2<sub>1</sub>/c</i> (no. 14)                                                                               |
| <i>a</i> [Å]                                   | 25.143(1)                                                                | 8.6425(6)                                            | 12.9302(5)                                                                                                     |
| <i>b</i> [Å]                                   | 25.143(1)                                                                | 13.5124(7)                                           | 18.6083(8)                                                                                                     |
| <i>c</i> [Å]                                   | 8.4349(4)                                                                | 24.174(2)                                            | 22.976(1)                                                                                                      |
| $\alpha$ [°]                                   | 90                                                                       | 90                                                   | 90                                                                                                             |
| $\beta$ [°]                                    | 90                                                                       | 97.545(2)                                            | 92.540(2)                                                                                                      |
| $\gamma$ [°]                                   | 90                                                                       | 90                                                   | 90                                                                                                             |
| <i>V</i> [Å <sup>3</sup> ]                     | 5332.1(6)                                                                | 2798.6(3)                                            | 5522.8(4)                                                                                                      |
| <i>Z</i>                                       | 8                                                                        | 4                                                    | 4                                                                                                              |
| $\mu$ (Mo K $\alpha$ ) [mm <sup>-1</sup> ]     | 5.623                                                                    | 0.836                                                | 0.559                                                                                                          |
| Diffns collected                               | 57467                                                                    | 50649                                                | 109514                                                                                                         |
| Independent diffns                             | 6354                                                                     | 6418                                                 | 12720                                                                                                          |
| Observed <sup>a</sup> diffns                   | 6032                                                                     | 5819                                                 | 11477                                                                                                          |
| <i>R</i> <sub>int</sub> <sup>b</sup> [%]       | 2.36                                                                     | 2.97                                                 | 2.81                                                                                                           |
| No. of parameters                              | 293                                                                      | 324                                                  | 675                                                                                                            |
| <i>R</i> <sup>b</sup> obsd diffns [%]          | 3.28                                                                     | 2.28                                                 | 2.57                                                                                                           |
| <i>R</i> , <i>wR</i> <sup>b</sup> all data [%] | 3.47, 7.25                                                               | 2.73, 5.19                                           | 3.07, 6.24                                                                                                     |
| $\Delta\rho$ [e Å <sup>-3</sup> ]              | 1.77, -1.34                                                              | 0.53, -0.42                                          | 0.54, -0.67                                                                                                    |
| CCDC deposition no.                            | 2119584                                                                  | 2119585                                              | 2119586                                                                                                        |

**Table S2 continued**

| Compound                                       | <b>10</b> ·MeCN                                                    | <b>11</b> ·Me <sub>2</sub> CO                                                     |
|------------------------------------------------|--------------------------------------------------------------------|-----------------------------------------------------------------------------------|
| Formula                                        | C <sub>27</sub> H <sub>34</sub> Cl <sub>3</sub> N <sub>4</sub> PPd | C <sub>53</sub> H <sub>68</sub> Cl <sub>4</sub> N <sub>6</sub> OP <sub>2</sub> Pd |
| <i>M</i>                                       | 658.30                                                             | 1115.27                                                                           |
| <i>T</i> [K]                                   | 120(2)                                                             | 130(2)                                                                            |
| Crystal system                                 | triclinic                                                          | monoclinic                                                                        |
| Space group                                    | <i>P</i> -1 (no. 2)                                                | <i>P</i> 2 <sub>1</sub> / <i>c</i> (no. 14)                                       |
| <i>a</i> [Å]                                   | 9.3439(4)                                                          | 21.5183(8)                                                                        |
| <i>b</i> [Å]                                   | 10.3772(4)                                                         | 14.4903(5)                                                                        |
| <i>c</i> [Å]                                   | 16.5278(7)                                                         | 19.5743(8)                                                                        |
| α [°]                                          | 91.699(1)                                                          | 90                                                                                |
| β [°]                                          | 97.475(1)                                                          | 115.795(1)                                                                        |
| γ [°]                                          | 110.848(1)                                                         | 90                                                                                |
| <i>V</i> [Å] <sup>3</sup>                      | 1479.9(1)                                                          | 5495.2(4)                                                                         |
| <i>Z</i>                                       | 2                                                                  | 4                                                                                 |
| μ(Mo Kα) [mm <sup>-1</sup> ]                   | 0.975                                                              | 0.633                                                                             |
| Diffns collected                               | 73450                                                              | 76236                                                                             |
| Independent diffns                             | 6778                                                               | 11437                                                                             |
| Observed <sup>a</sup> diffns                   | 6694                                                               | 9766                                                                              |
| <i>R</i> <sub>int</sub> <sup>b</sup> [%]       | 1.78                                                               | 3.68                                                                              |
| No. of parameters                              | 333                                                                | 614                                                                               |
| <i>R</i> <sup>b</sup> obsd diffns [%]          | 1.56                                                               | 2.84                                                                              |
| <i>R</i> , <i>wR</i> <sup>b</sup> all data [%] | 1.58, 4.05                                                         | 3.82, 6.52                                                                        |
| Δρ [e Å <sup>-3</sup> ]                        | 0.37, -0.41                                                        | 0.47, -0.63                                                                       |
| CCDC deposition no.                            | 2119587                                                            | 2119588                                                                           |



## Copies of the NMR spectra

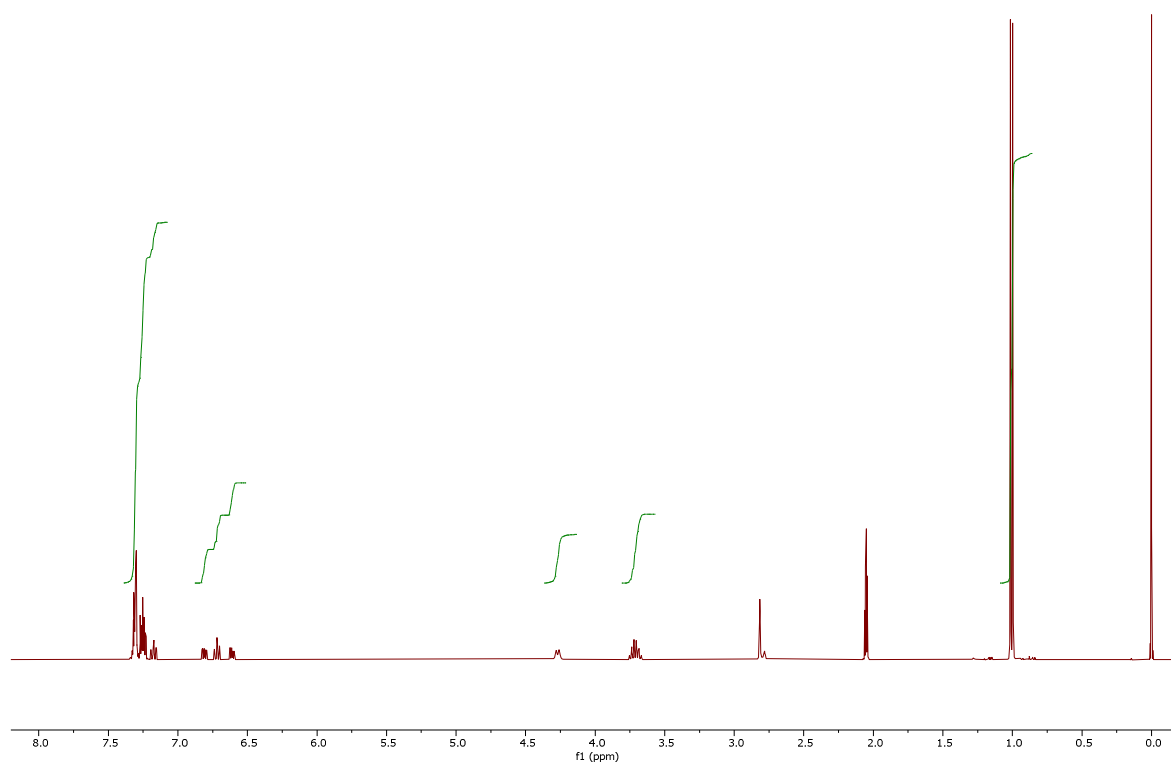

**Figure S19.**  $^1\text{H}$  NMR spectrum (acetone- $d_6$ , 400 MHz) of **1**

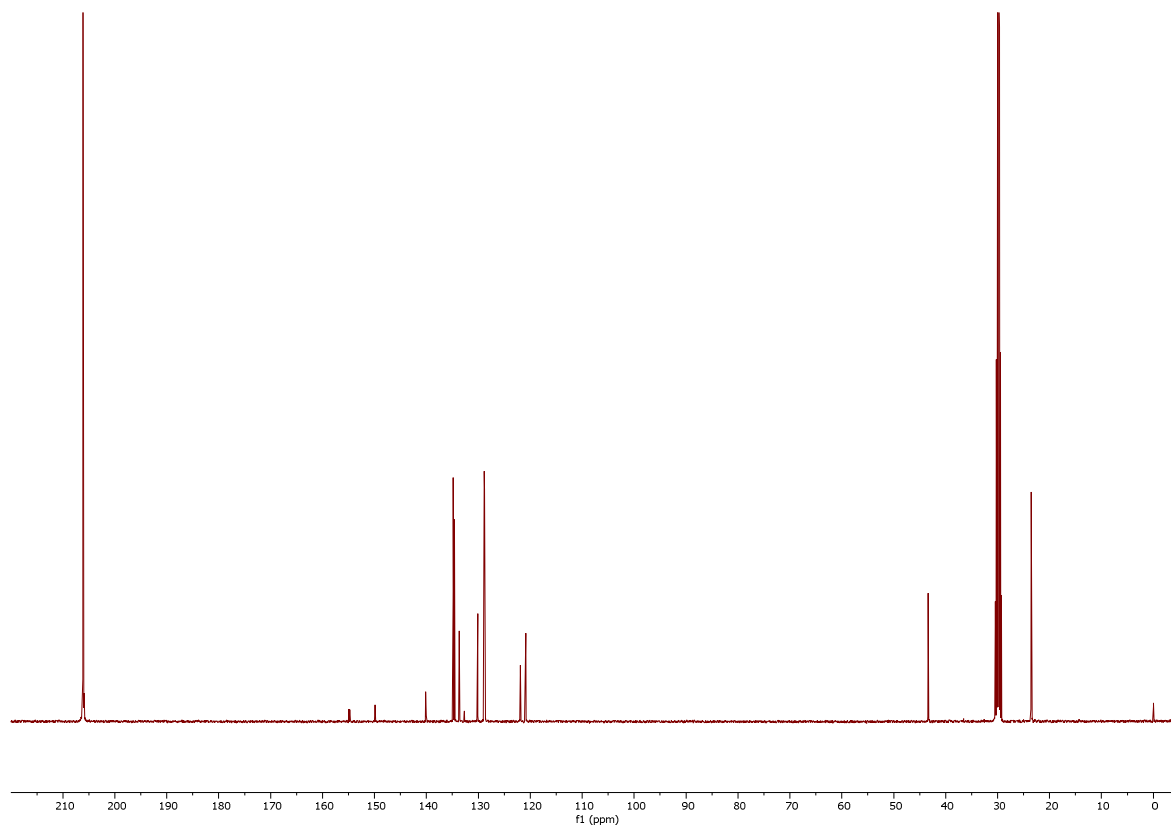

**Figure S20.**  $^{13}\text{C}\{^1\text{H}\}$  NMR spectrum (acetone- $d_6$ , 101 MHz) of **1**

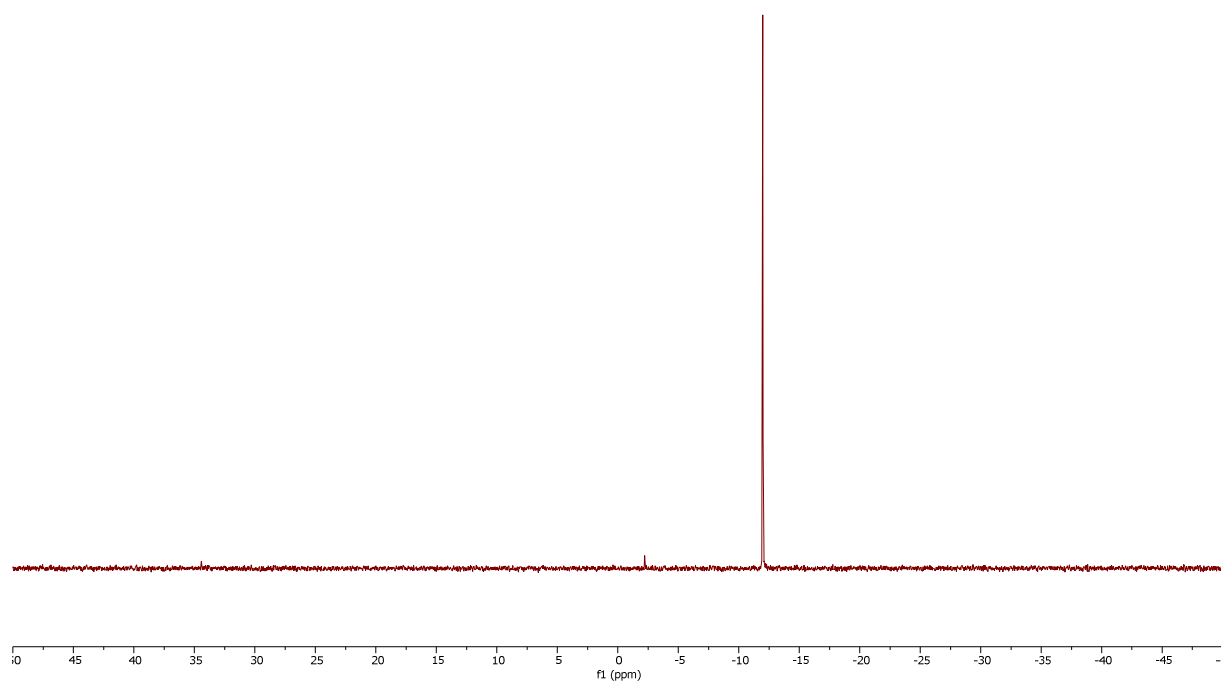

**Figure S21.**  $^{31}\text{P}\{^1\text{H}\}$  NMR spectrum (acetone- $d_6$ , 162 MHz) of **1**

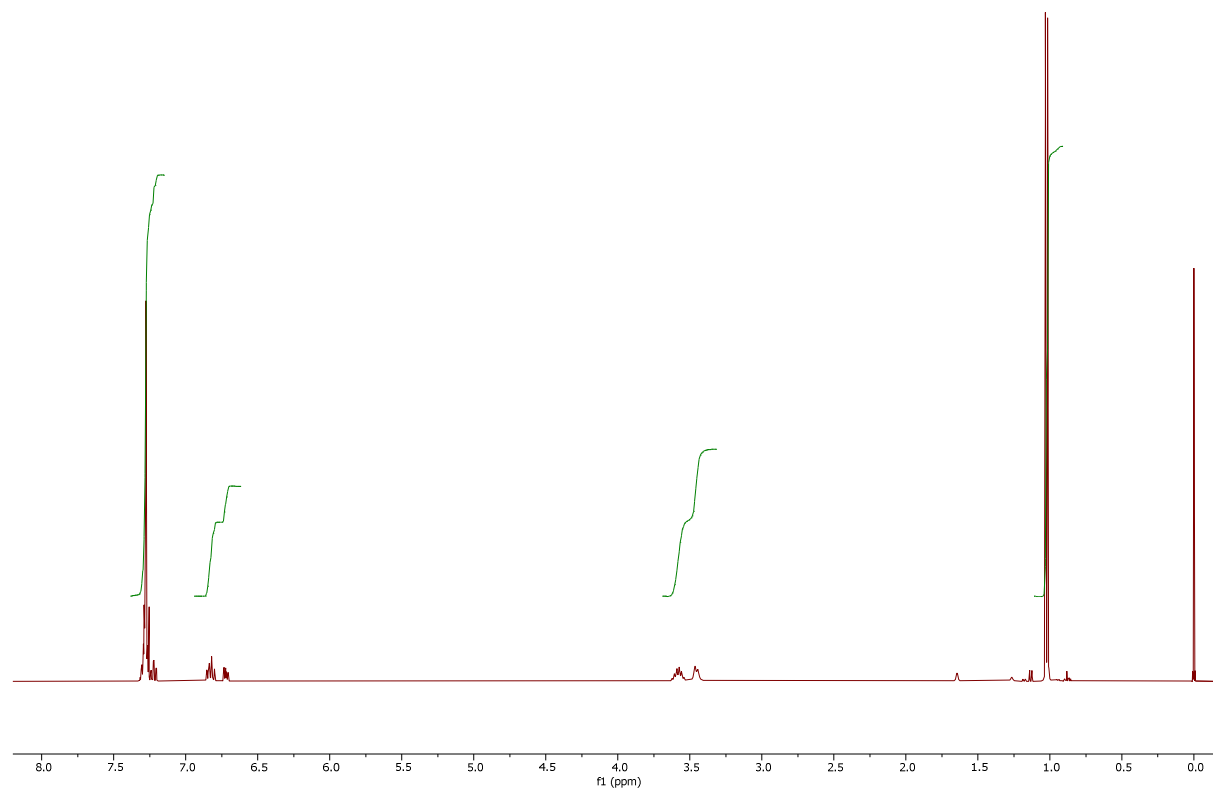

**Figure S22.**  $^1\text{H}$  NMR spectrum ( $\text{CDCl}_3$ , 400 MHz) of **1**

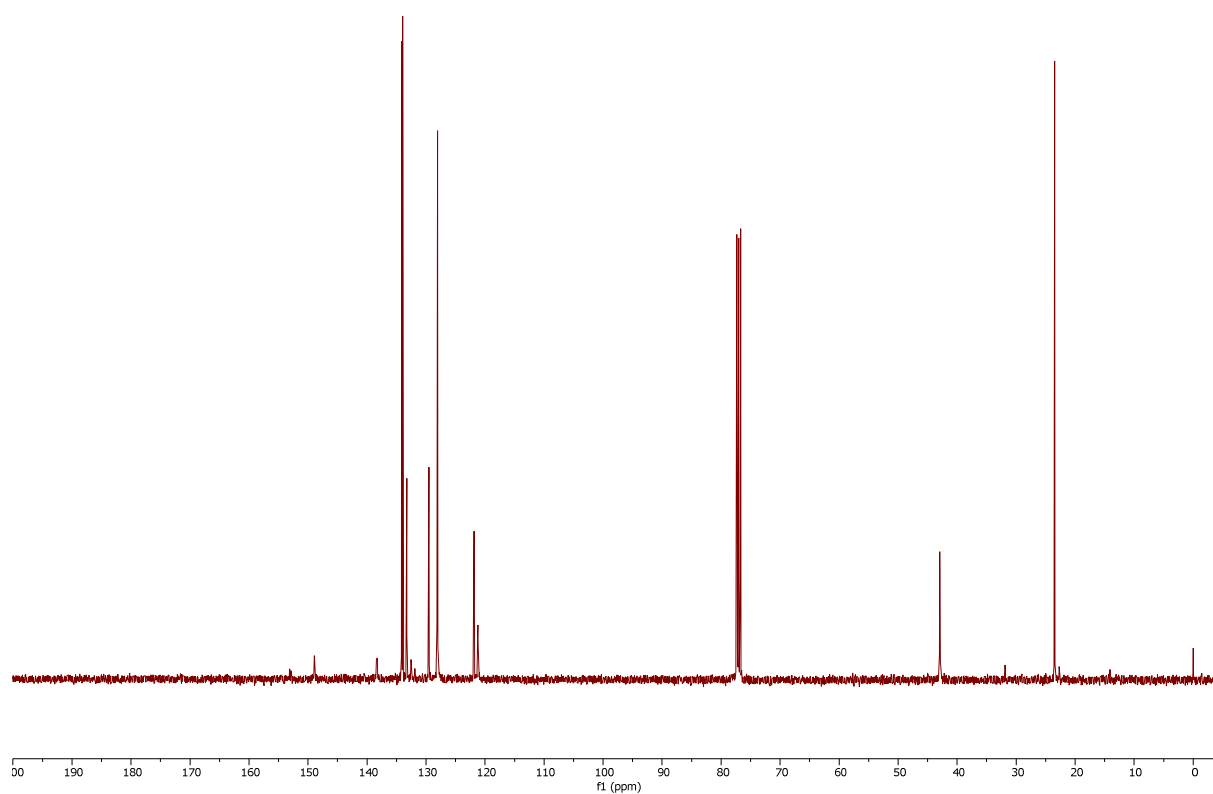

**Figure S23.**  $^{13}\text{C}\{^1\text{H}\}$  NMR spectrum ( $\text{CDCl}_3$ , 101 MHz) of **1**

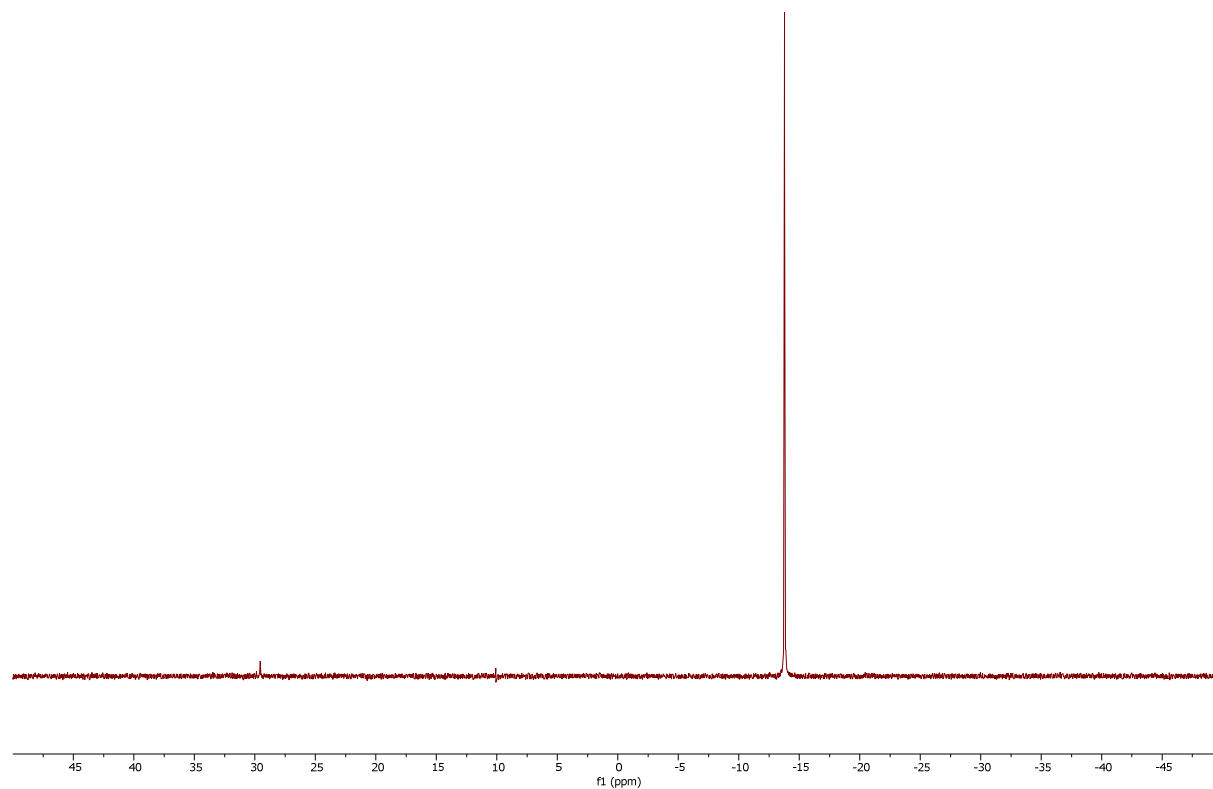

**Figure S24.**  $^{31}\text{P}\{^1\text{H}\}$  NMR spectrum ( $\text{CDCl}_3$ , 162 MHz) of **1**

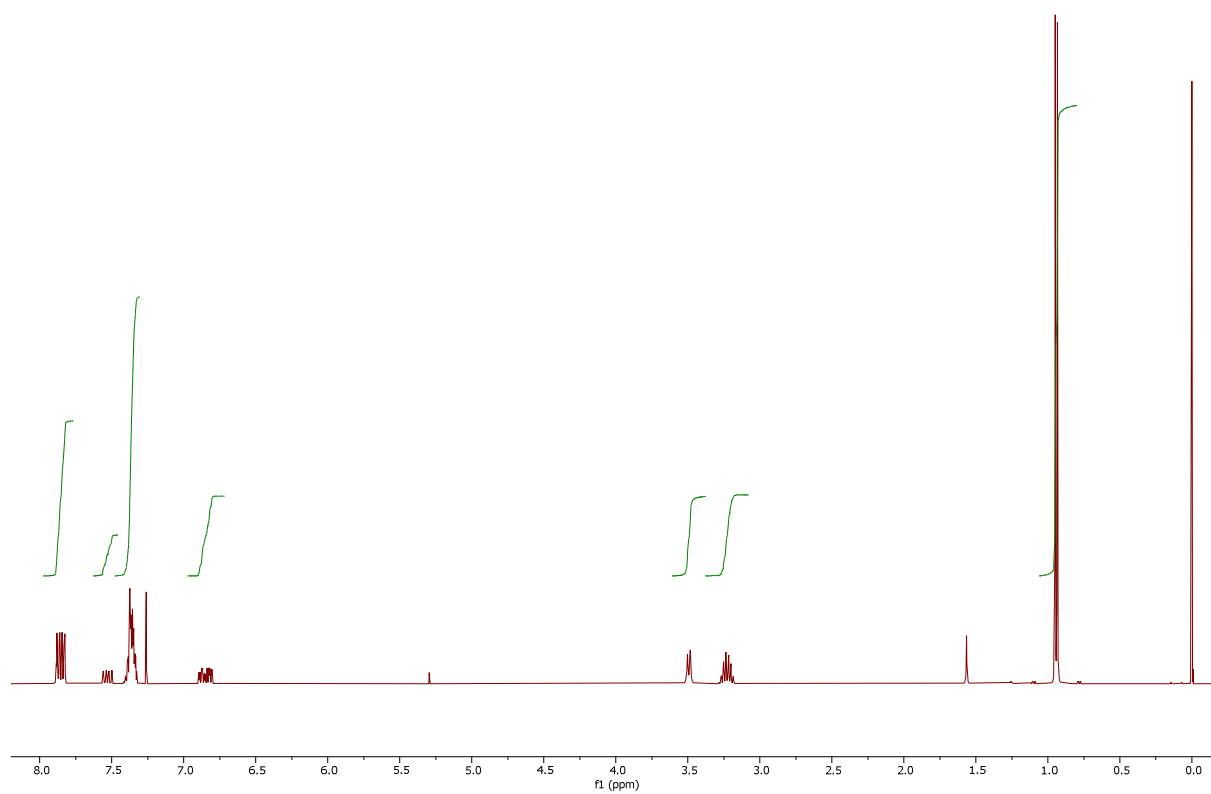

**Figure S25.**  $^1\text{H}$  NMR spectrum ( $\text{CDCl}_3$ , 400 MHz) of **3**

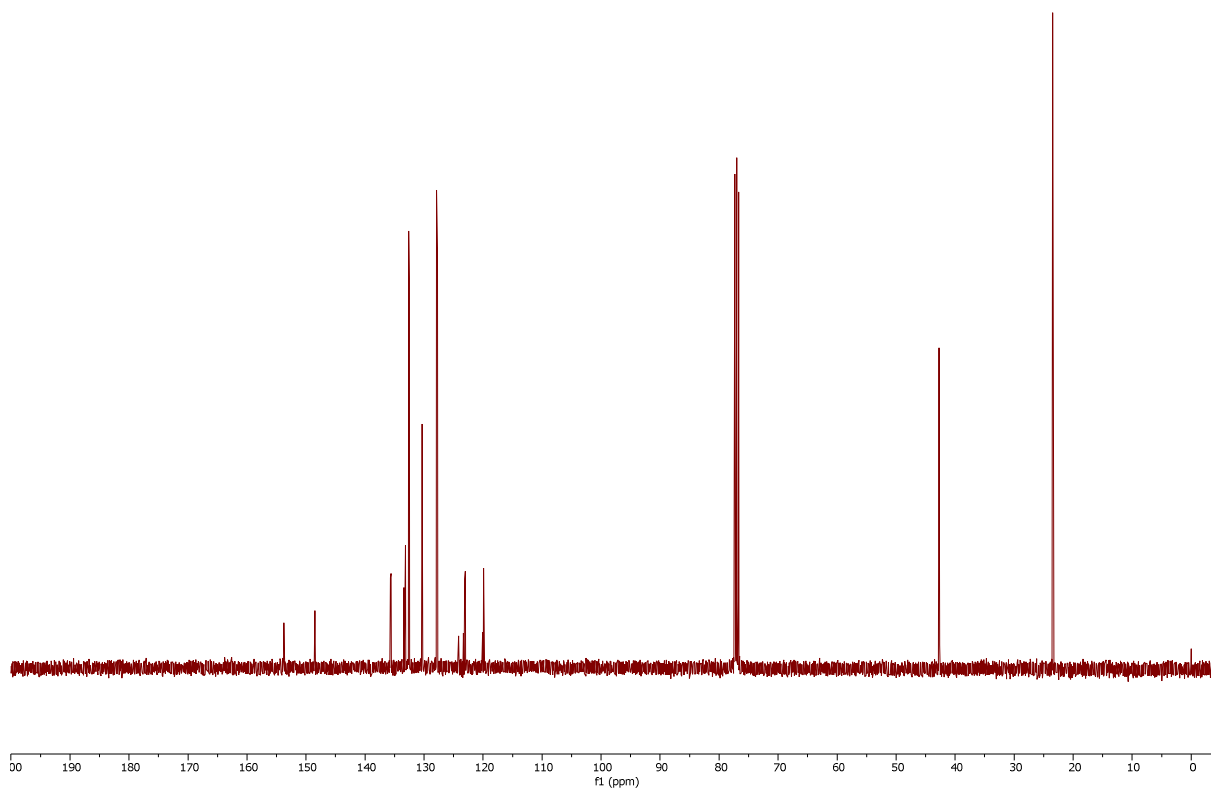

**Figure S26.**  $^{13}\text{C}\{^1\text{H}\}$  NMR spectrum ( $\text{CDCl}_3$ , 101 MHz) of **3**

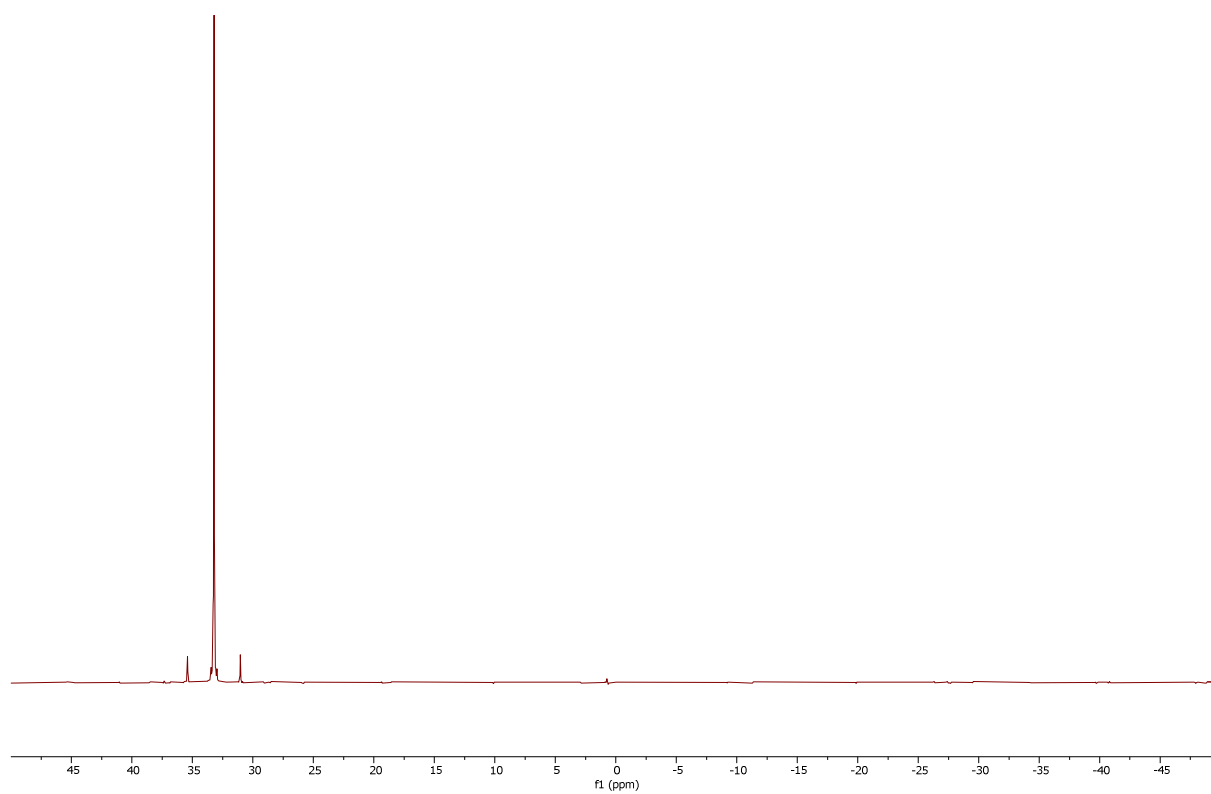

**Figure S27.**  $^{31}\text{P}\{^1\text{H}\}$  NMR spectrum ( $\text{CDCl}_3$ , 162 MHz) of **3**

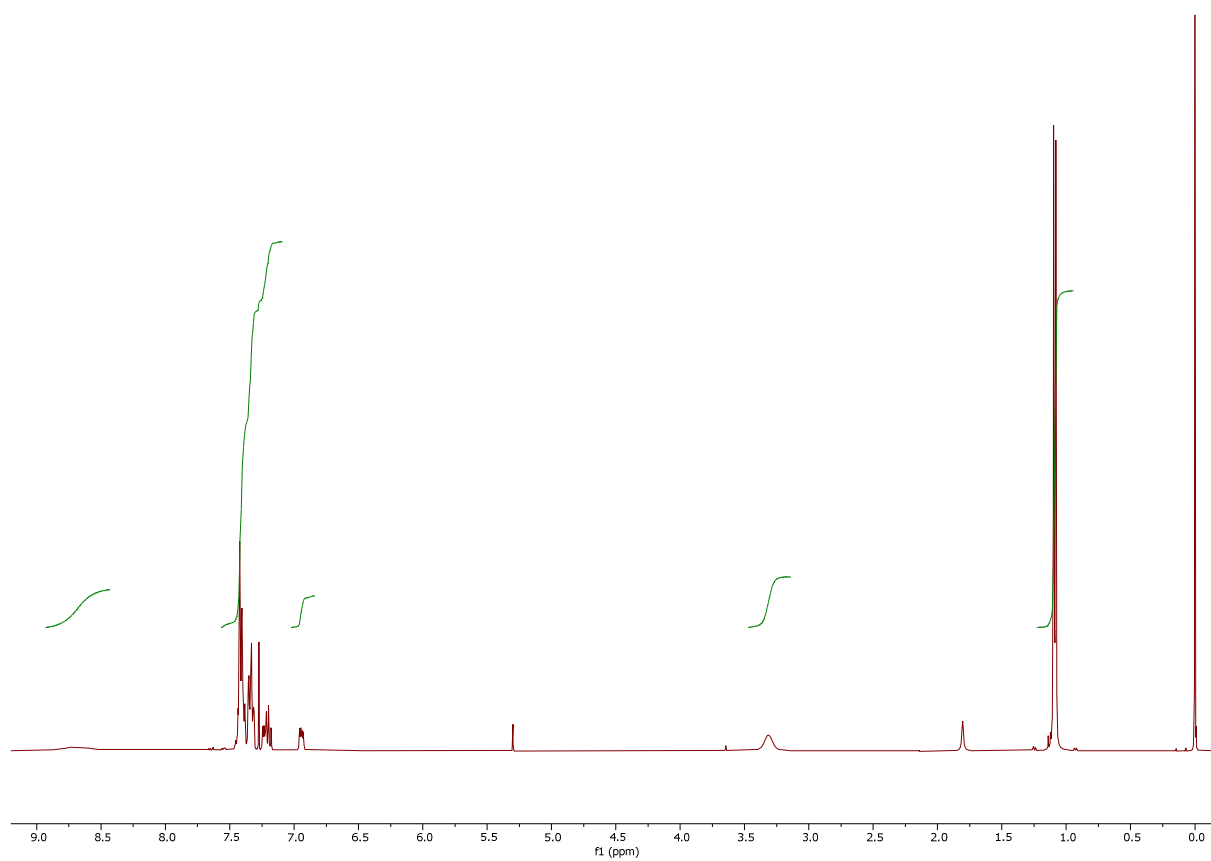

**Figure S28.**  $^1\text{H}$  NMR spectrum ( $\text{CDCl}_3$ , 400 MHz) of **(1H)Cl**

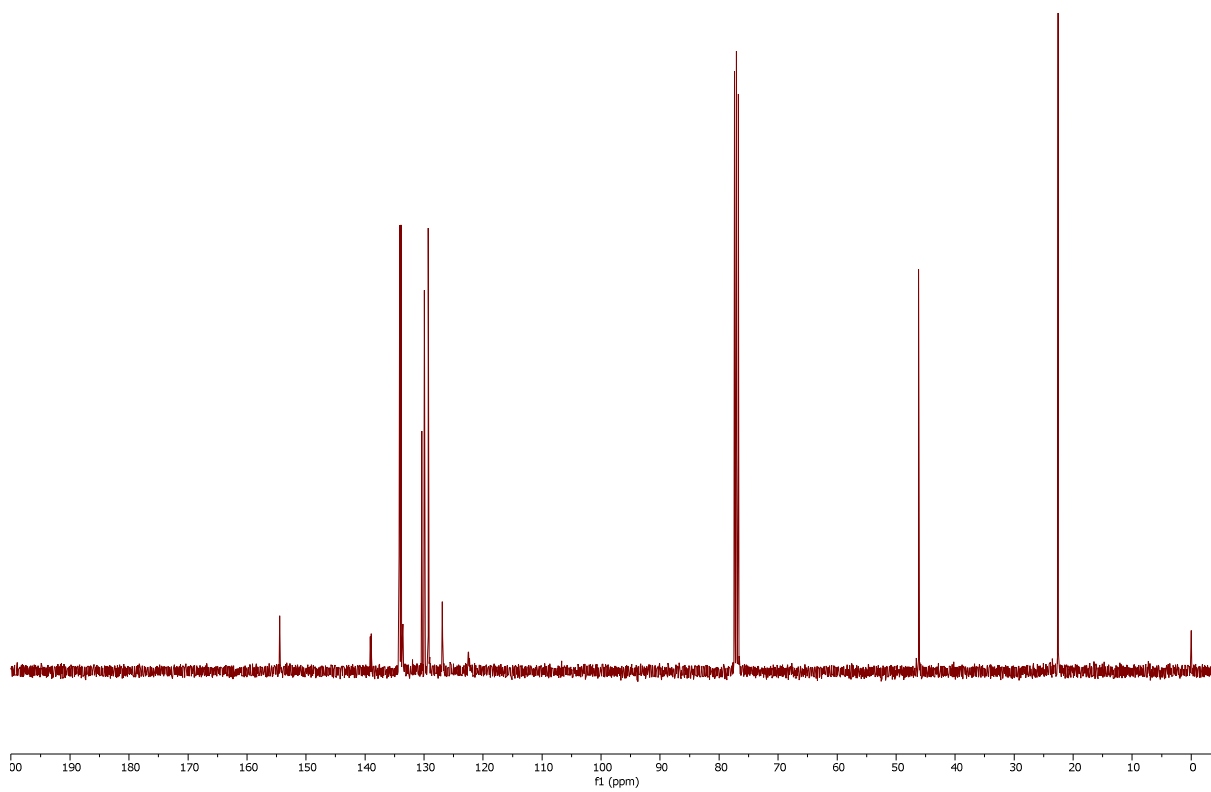

**Figure S29.**  $^{13}\text{C}\{^1\text{H}\}$  NMR spectrum ( $\text{CDCl}_3$ , 101 MHz) of **(1H)Cl**

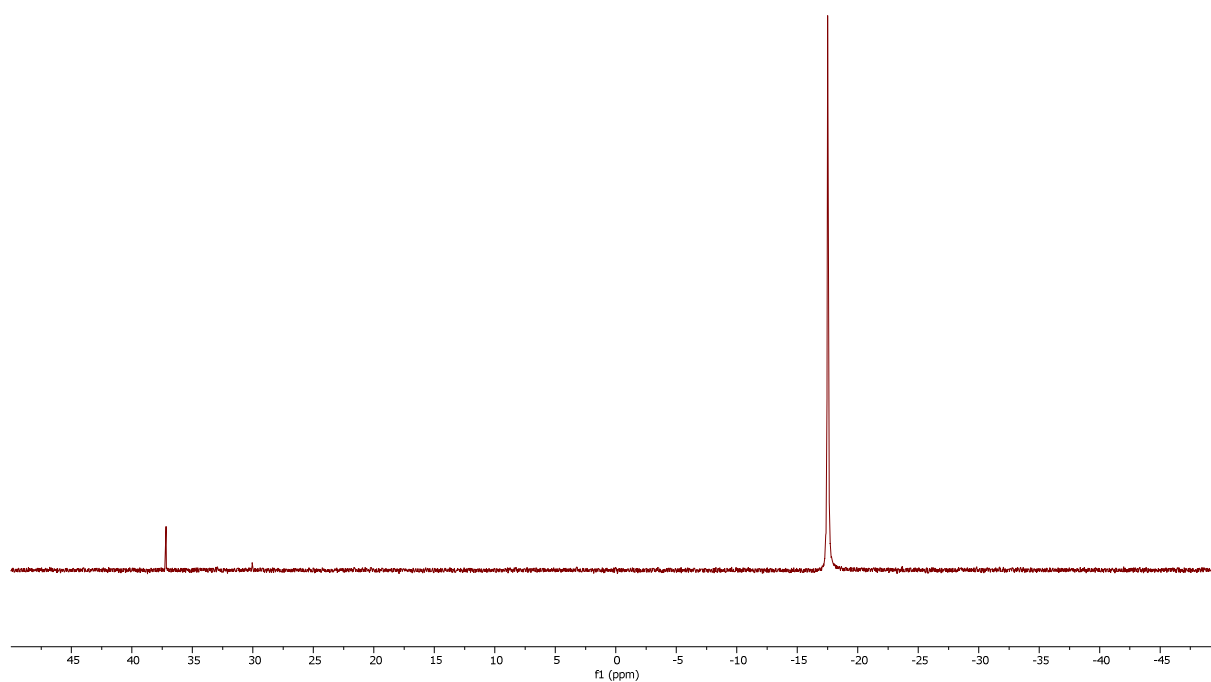

**Figure S30.**  $^{31}\text{P}\{^1\text{H}\}$  NMR spectrum ( $\text{CDCl}_3$ , 162 MHz) of **(1H)Cl**; the signal at  $\delta_{\text{p}}$  37.2 is due to traces of the corresponding phosphine oxide

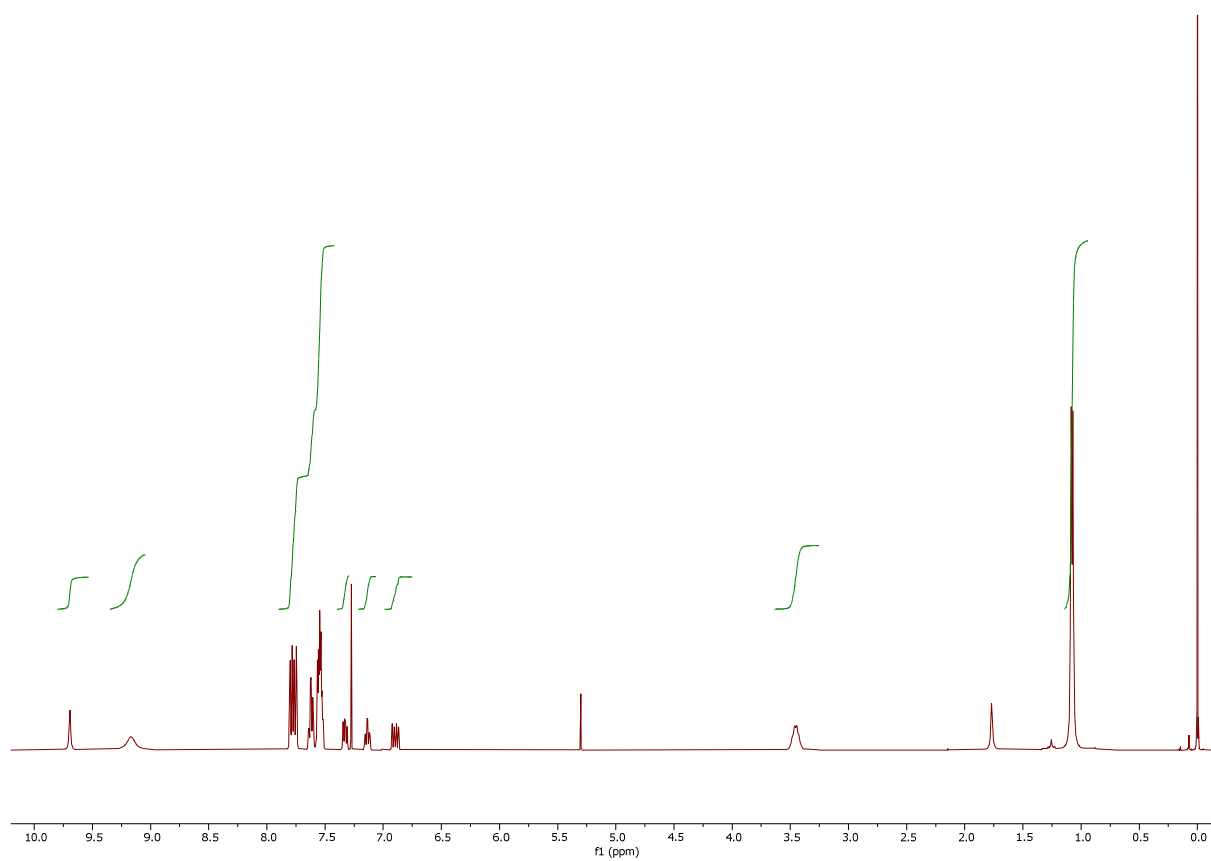

**Figure S31.**  $^1\text{H}$  NMR spectrum ( $\text{CDCl}_3$ , 400 MHz) of  $(\mathbf{3H})\text{Cl}$

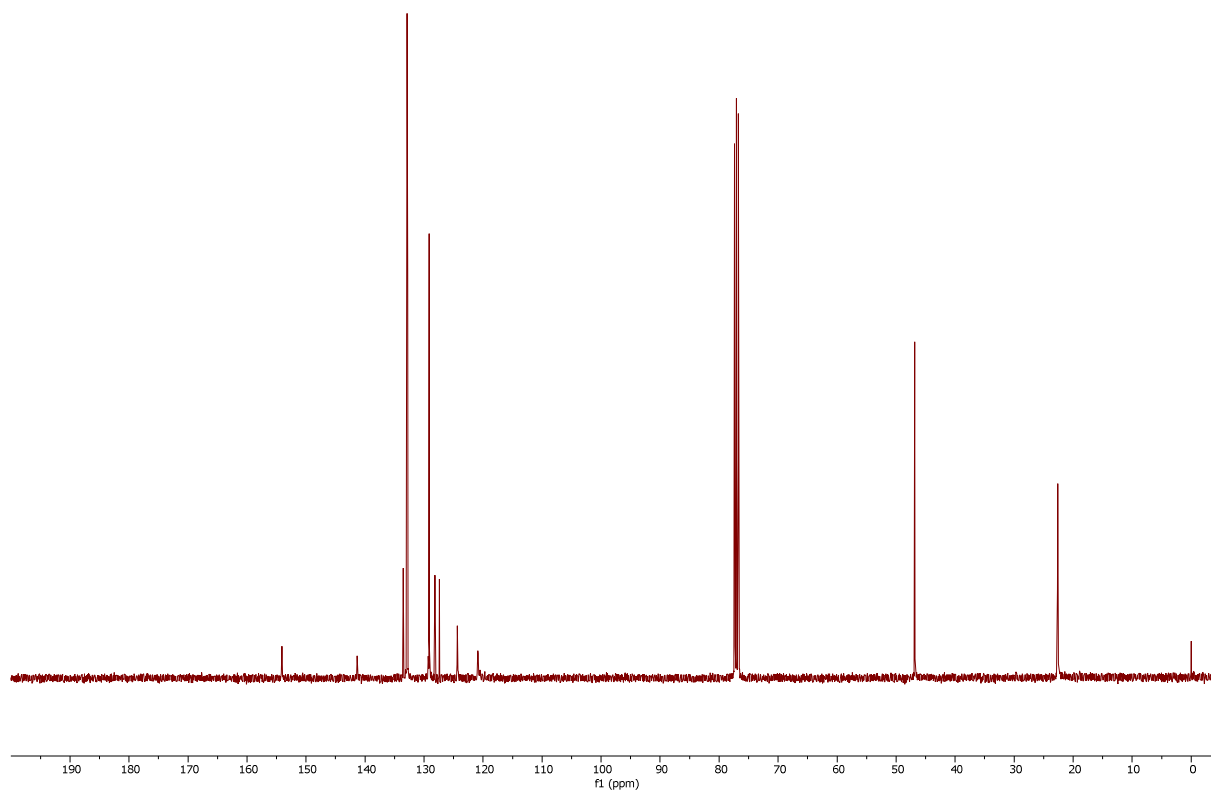

**Figure S32.**  $^{13}\text{C}\{^1\text{H}\}$  NMR spectrum ( $\text{CDCl}_3$ , 101 MHz) of  $(\mathbf{3H})\text{Cl}$



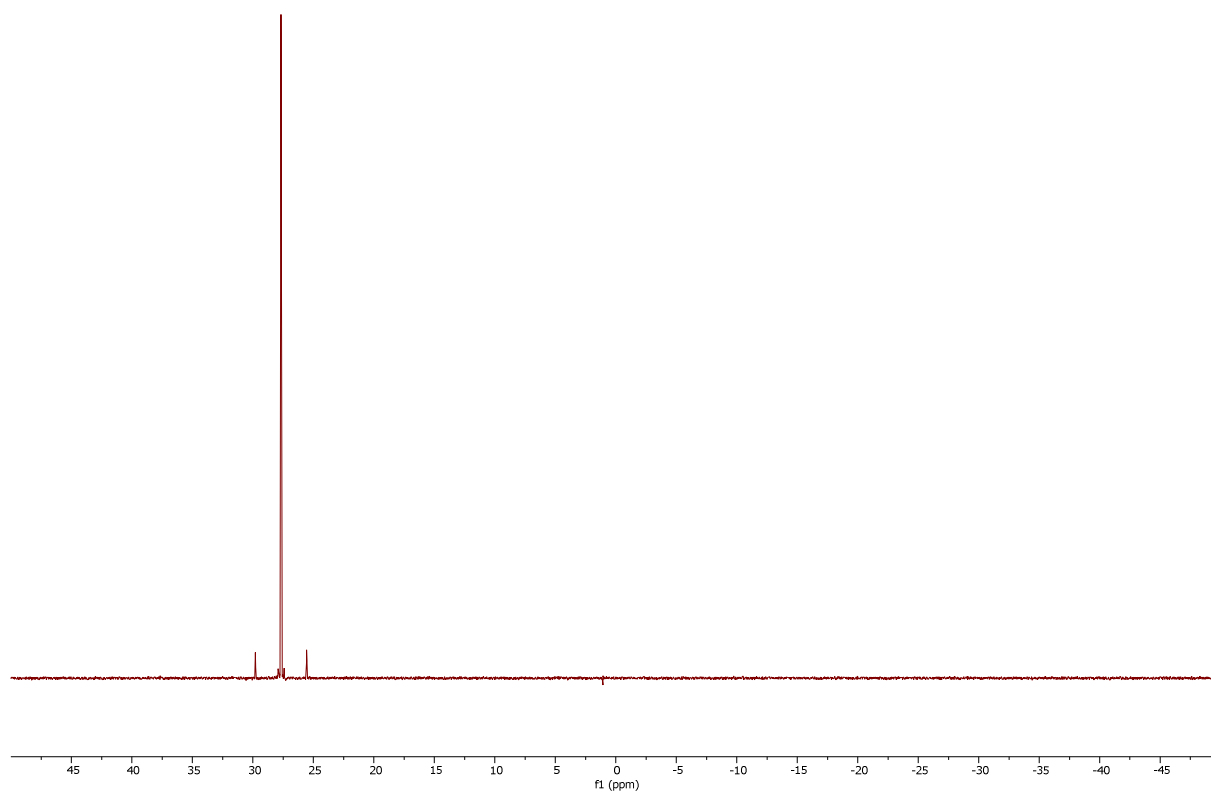

**Figure S33.**  $^{31}\text{P}\{^1\text{H}\}$  NMR spectrum ( $\text{CDCl}_3$ , 162 MHz) of  $(\mathbf{3H})\text{Cl}$

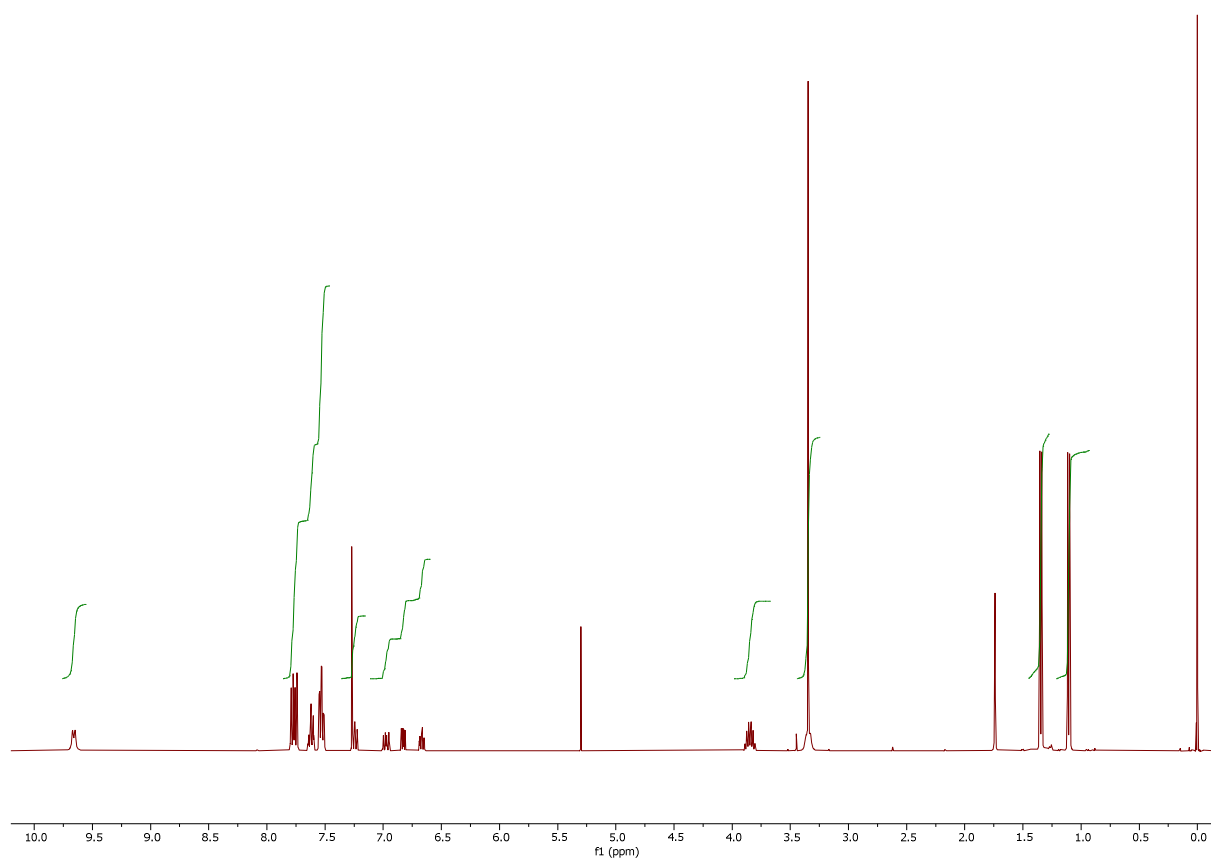

**Figure S34.**  $^1\text{H}$  NMR spectrum ( $\text{CDCl}_3$ , 400 MHz) of **5**

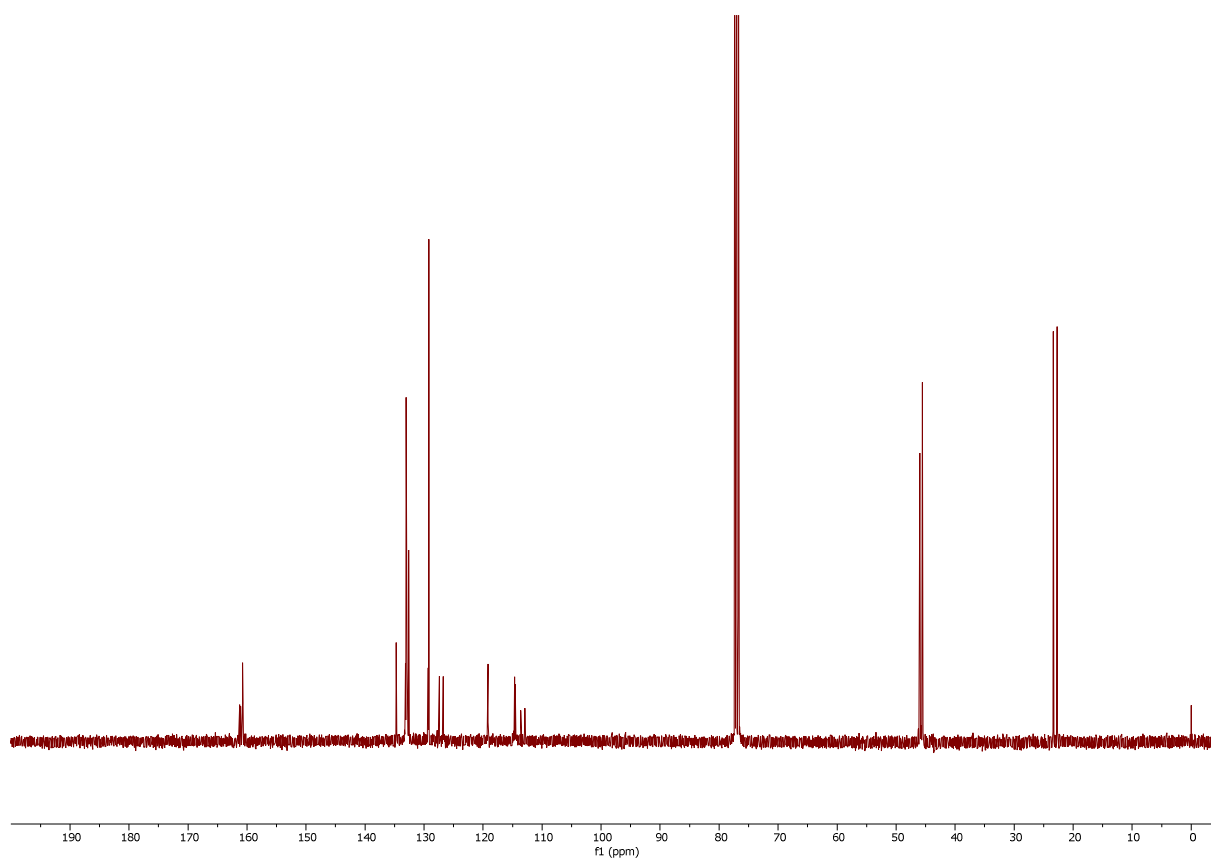

**Figure S35.**  $^{13}\text{C}\{^1\text{H}\}$  NMR spectrum ( $\text{CDCl}_3$ , 101 MHz) of **5**

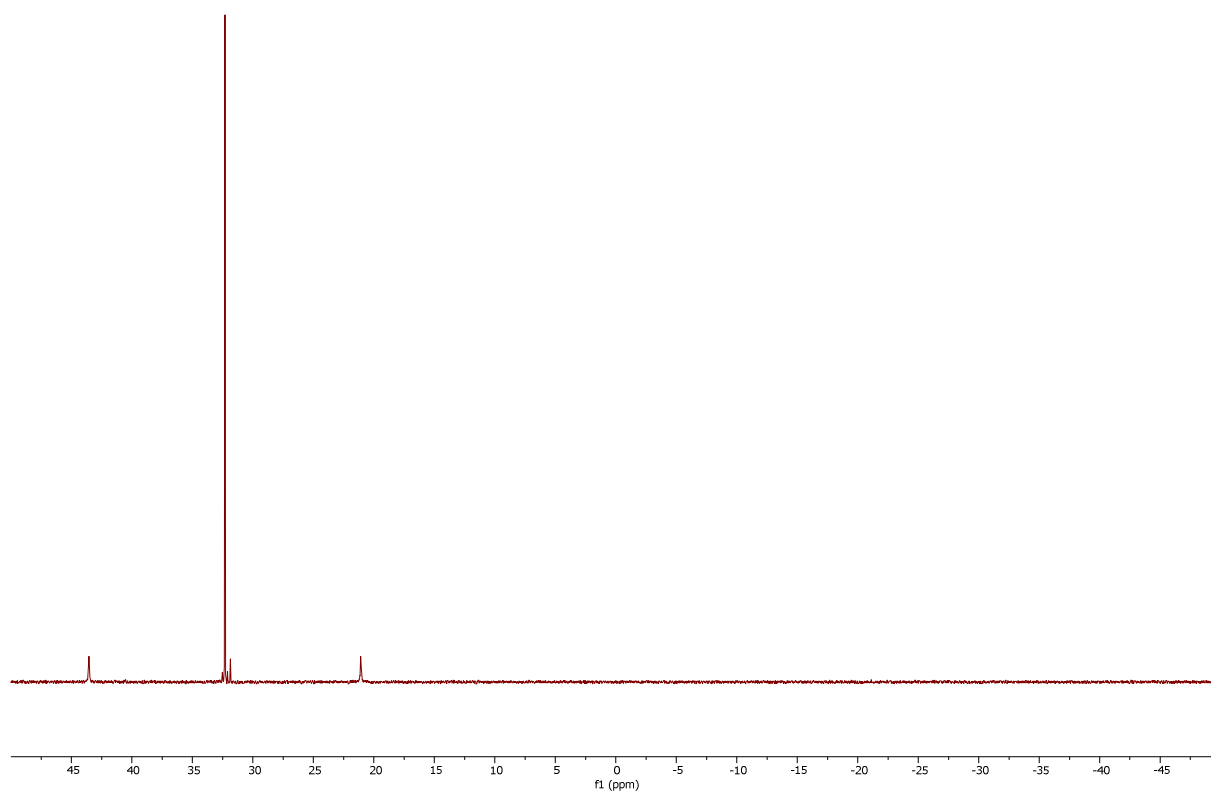

**Figure S36.**  $^{31}\text{P}\{^1\text{H}\}$  NMR spectrum ( $\text{CDCl}_3$ , 162 MHz) of **5**

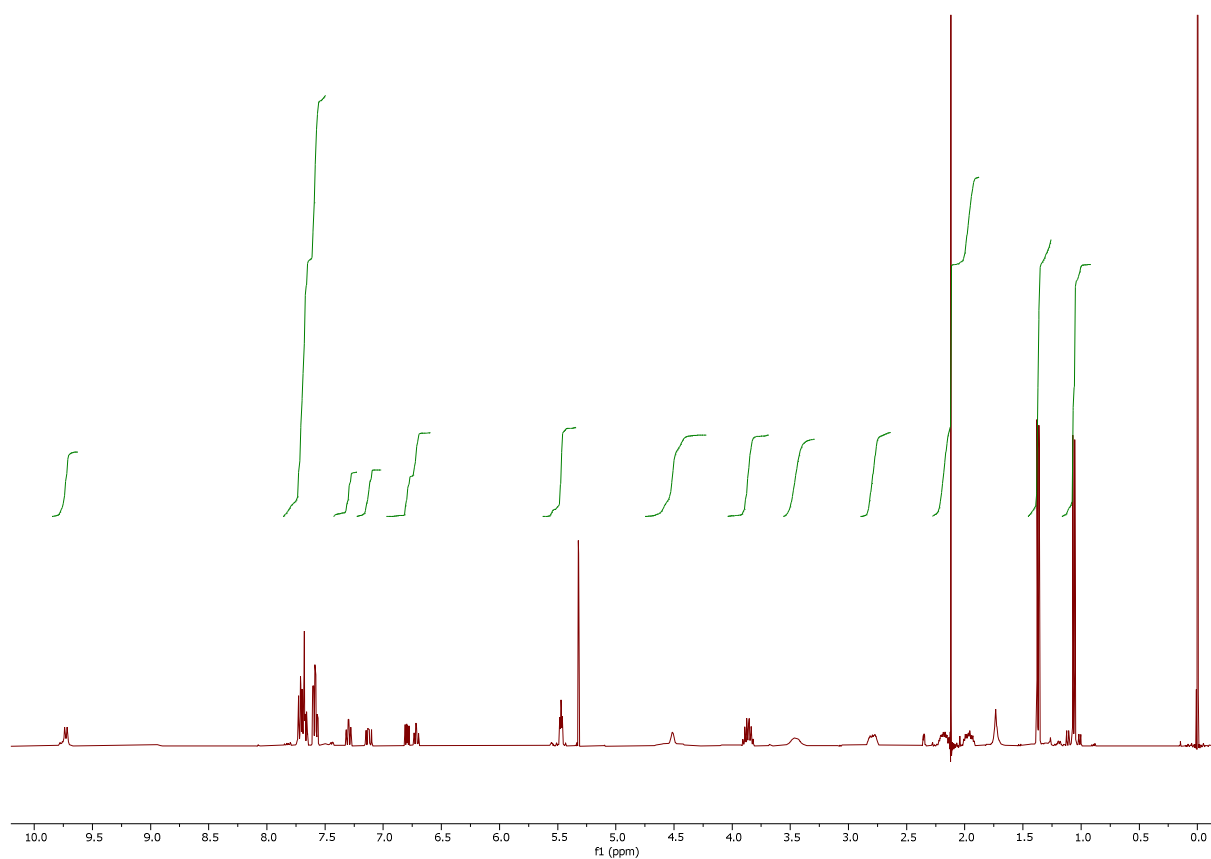

**Figure S37.**  $^1\text{H}$  NMR spectrum ( $\text{CD}_2\text{Cl}_2$ , 400 MHz) of **6**

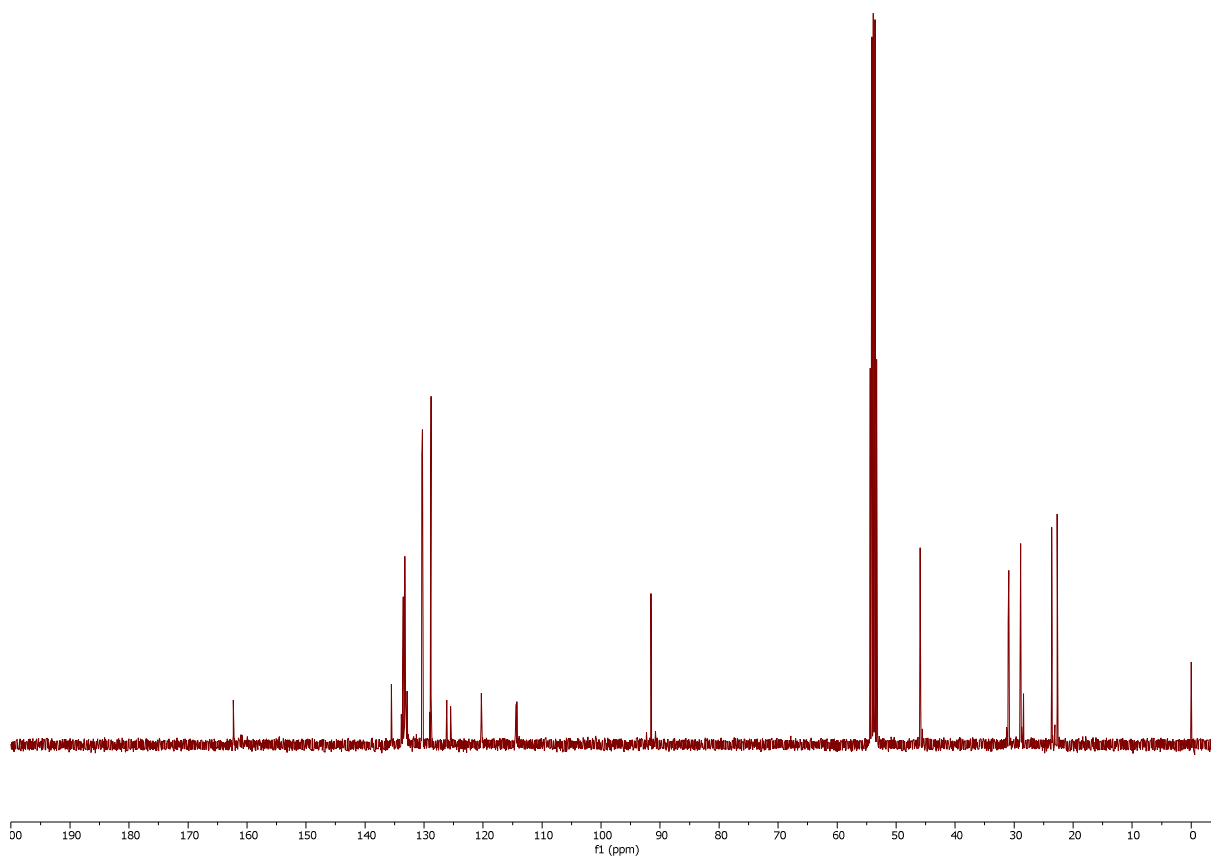

**Figure S38.**  $^{13}\text{C}\{^1\text{H}\}$  NMR spectrum ( $\text{CD}_2\text{Cl}_2$ , 101 MHz) of **6**

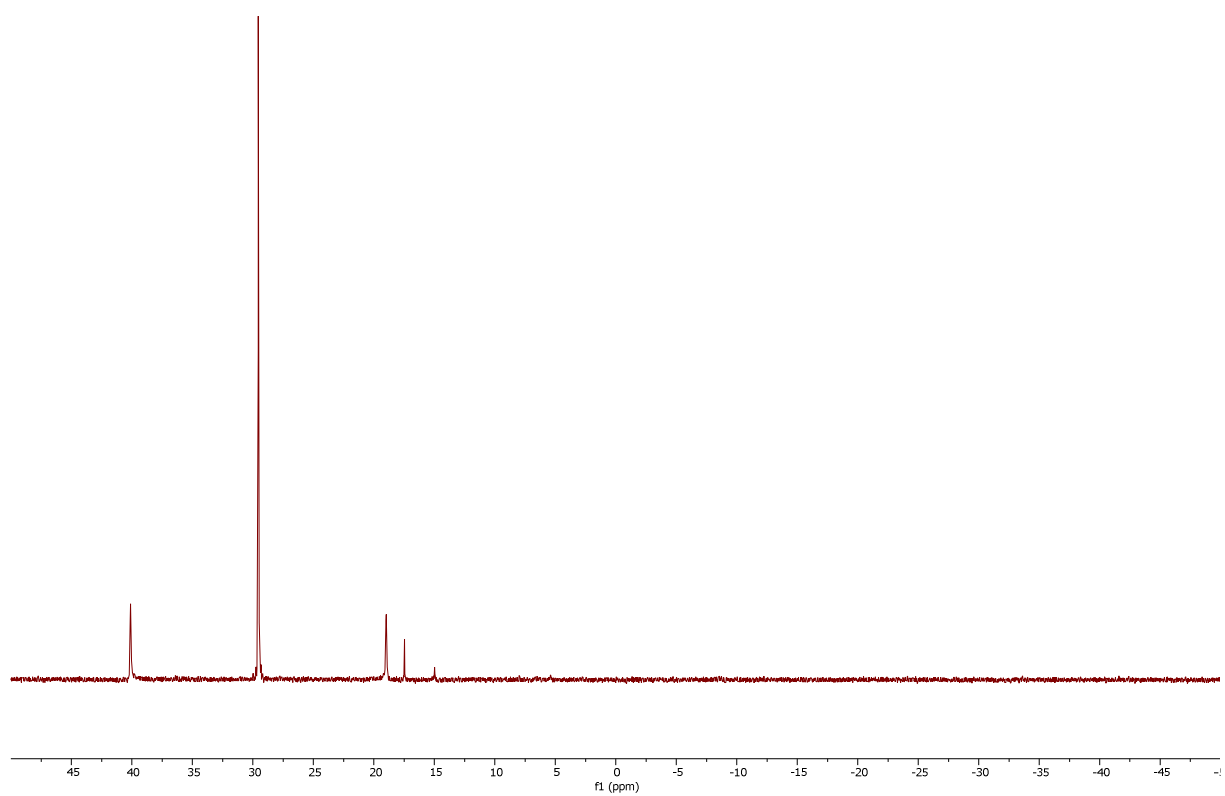

**Figure S39.**  $^{31}\text{P}\{^1\text{H}\}$  NMR spectrum ( $\text{CD}_2\text{Cl}_2$ , 162 MHz) of **6**

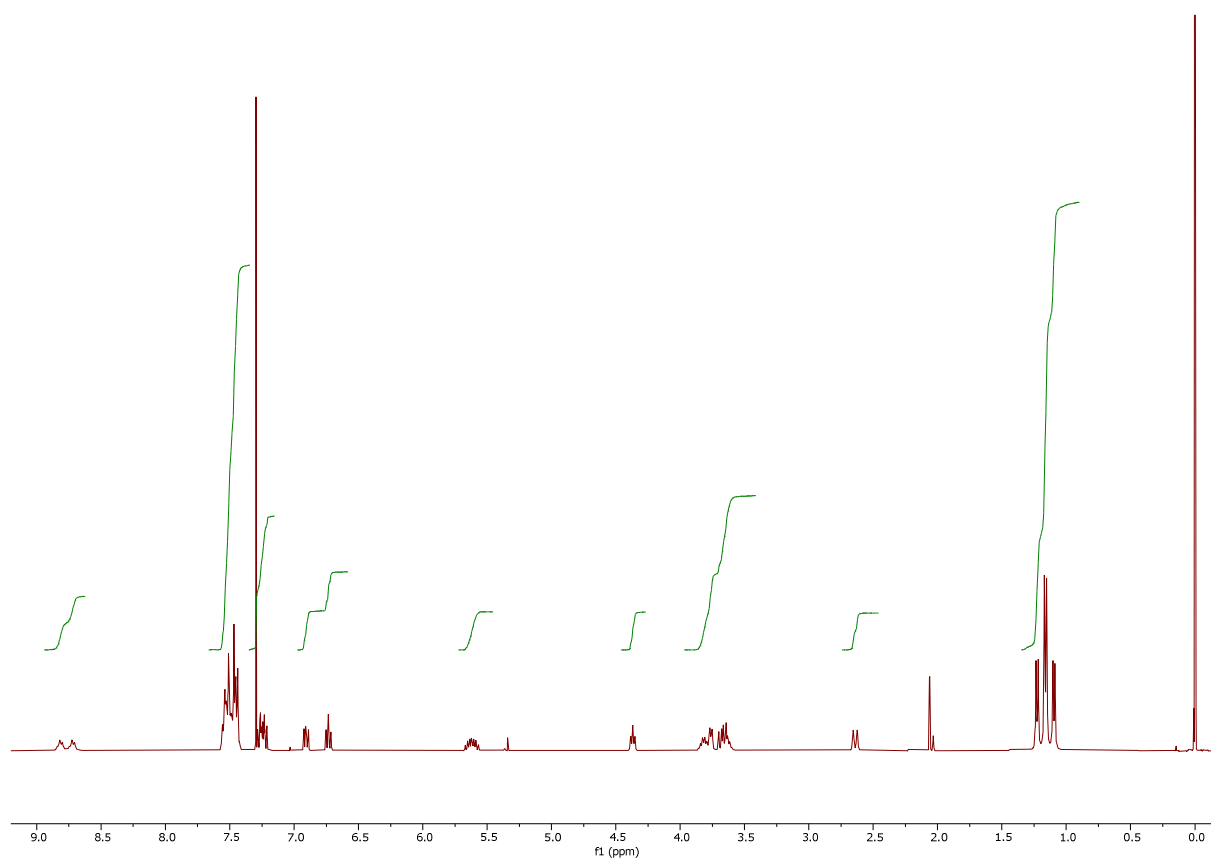

**Figure S40.**  $^1\text{H}$  NMR spectrum ( $-25^\circ\text{C}$ ,  $\text{CDCl}_3$ , 400 MHz) of **8**

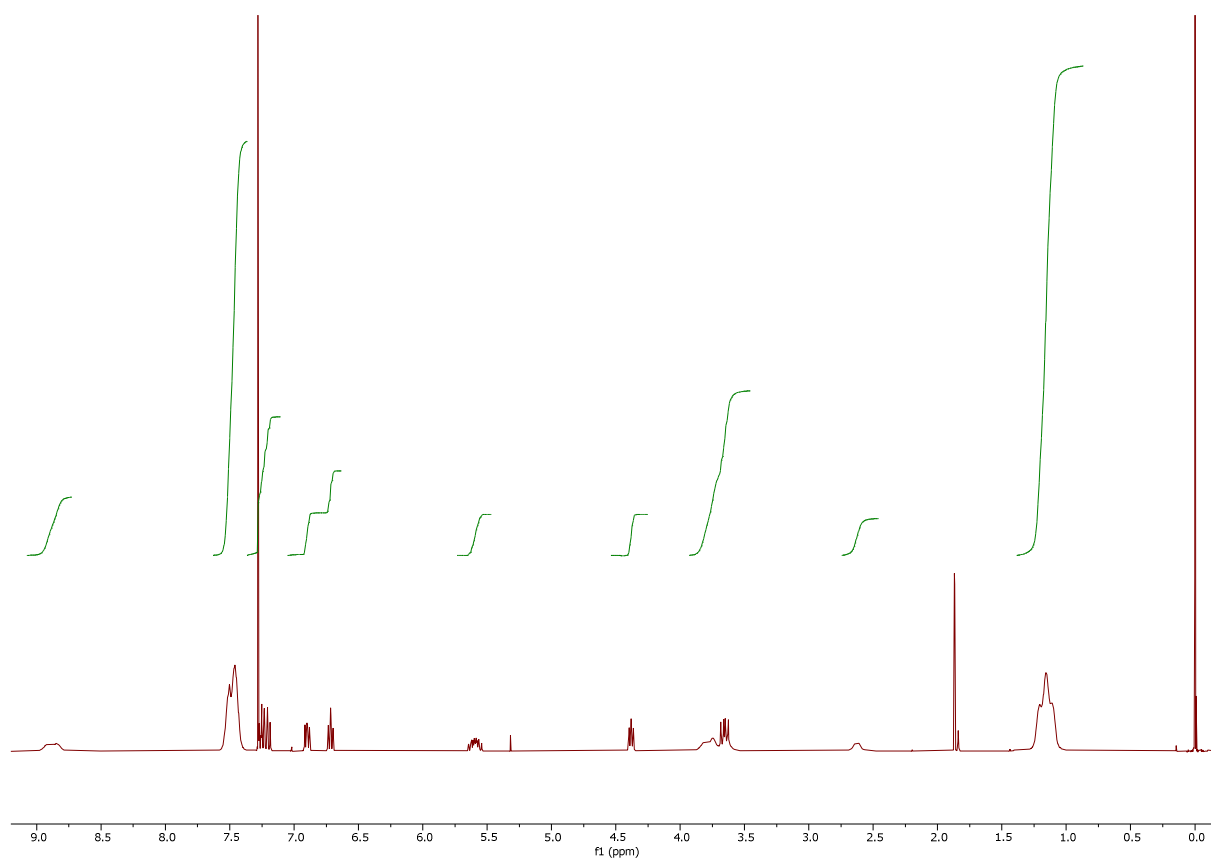

**Figure S41.**  $^1\text{H}$  NMR spectrum ( $0^\circ\text{C}$ ,  $\text{CDCl}_3$ , 400 MHz) of **8**

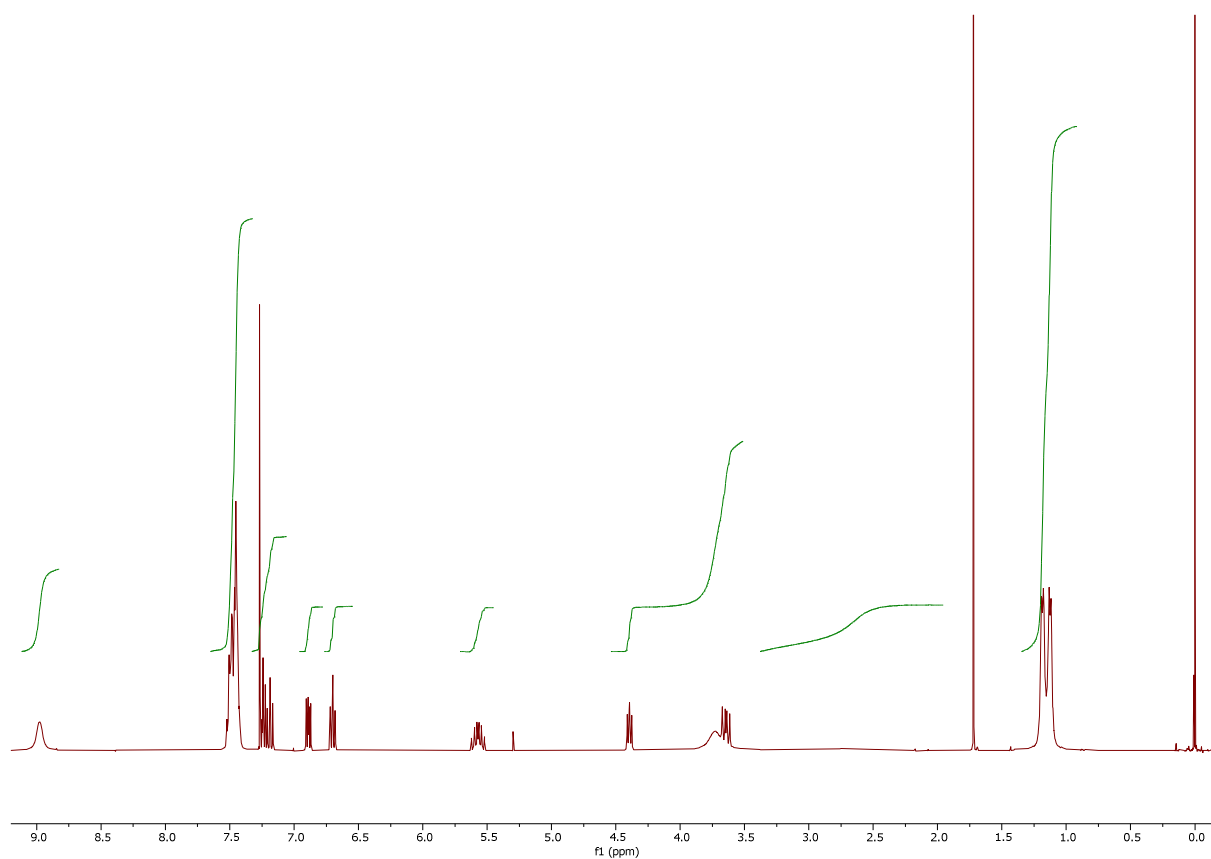

**Figure S42.**  $^1\text{H}$  NMR spectrum (25°C,  $\text{CDCl}_3$ , 400 MHz) of **8**

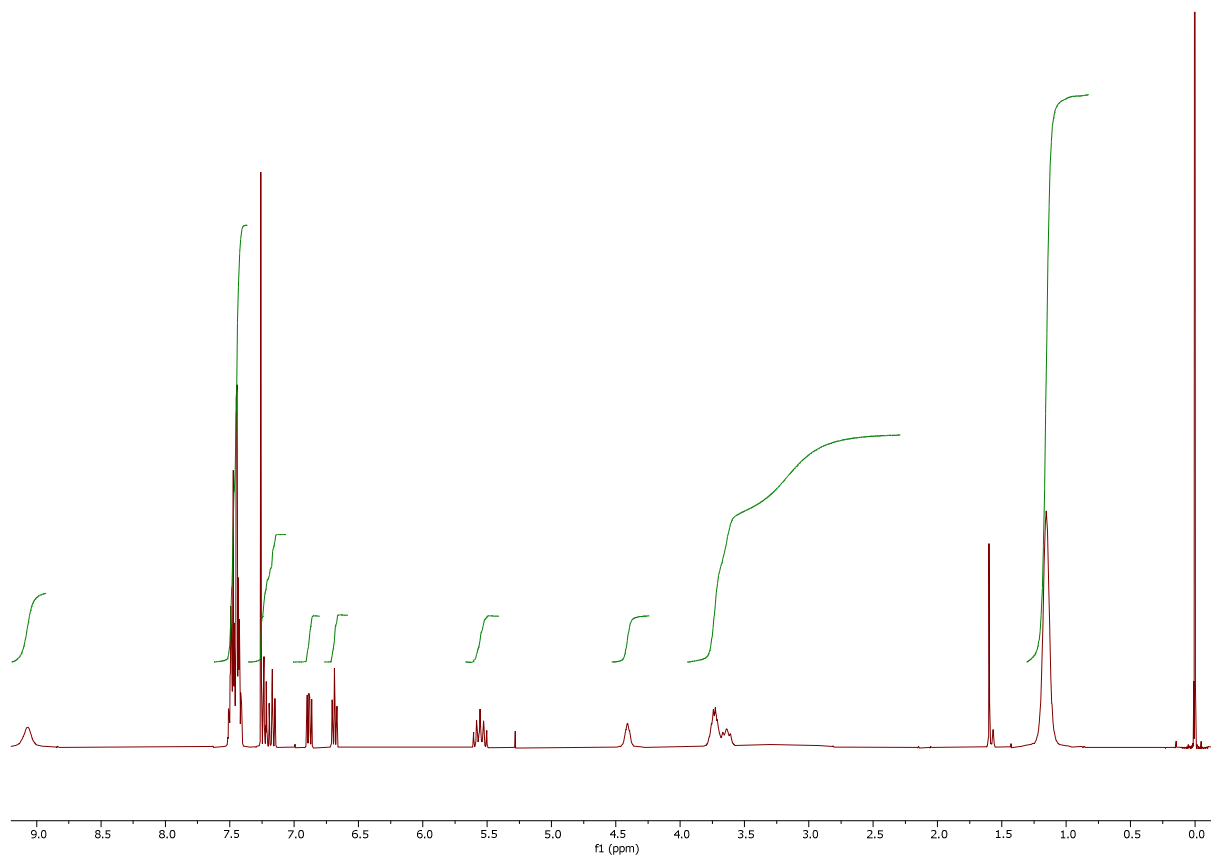

**Figure S43.**  $^1\text{H}$  NMR spectrum (50°C,  $\text{CDCl}_3$ , 400 MHz) of **8**

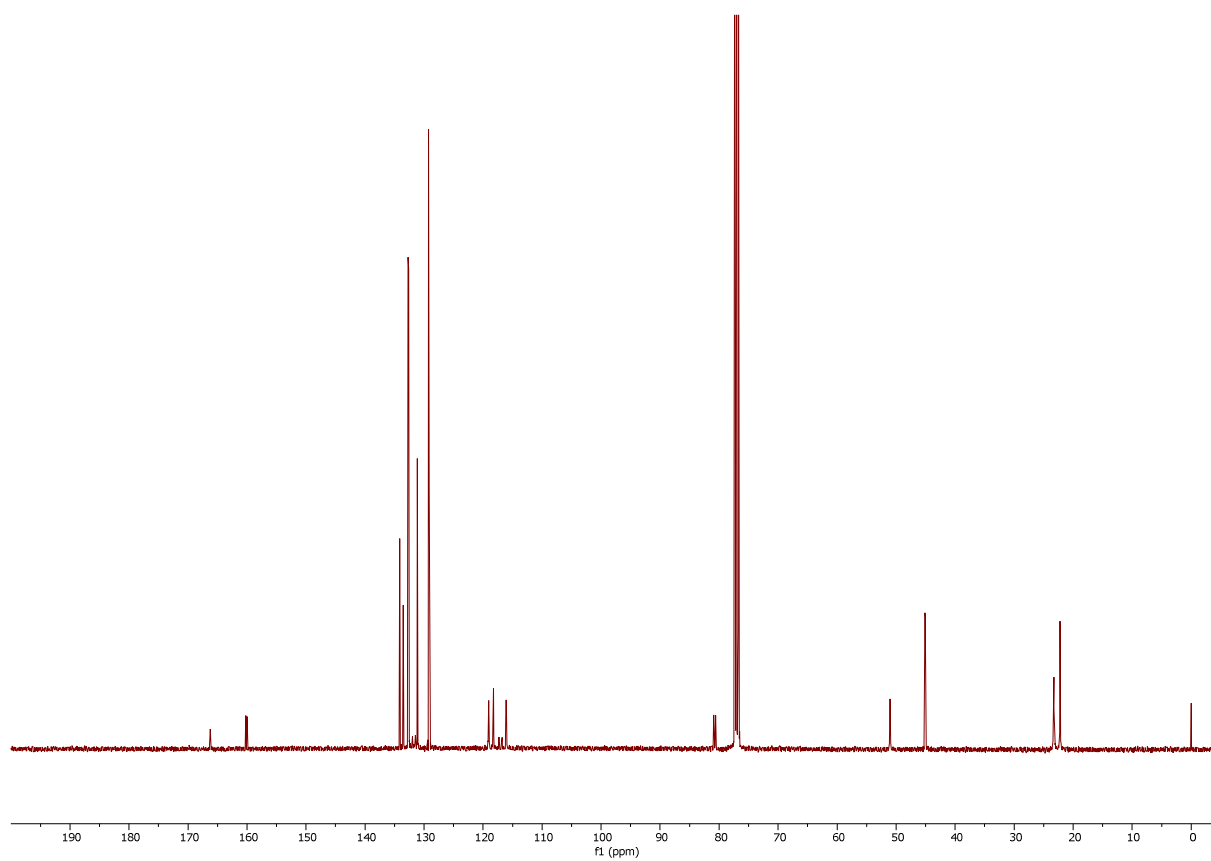

**Figure S44.**  $^{13}\text{C}\{^1\text{H}\}$  NMR spectrum ( $\text{CDCl}_3$ , 101 MHz) of **8**

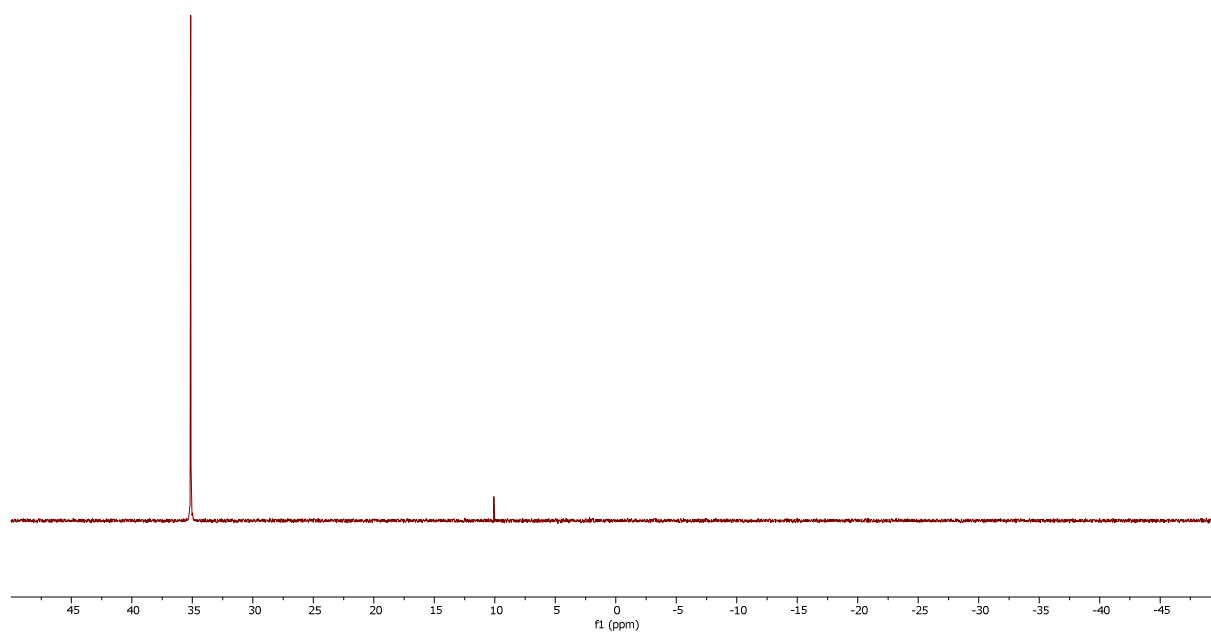

**Figure S45.**  $^{31}\text{P}\{^1\text{H}\}$  NMR spectrum ( $\text{CDCl}_3$ , 162 MHz) of **8**



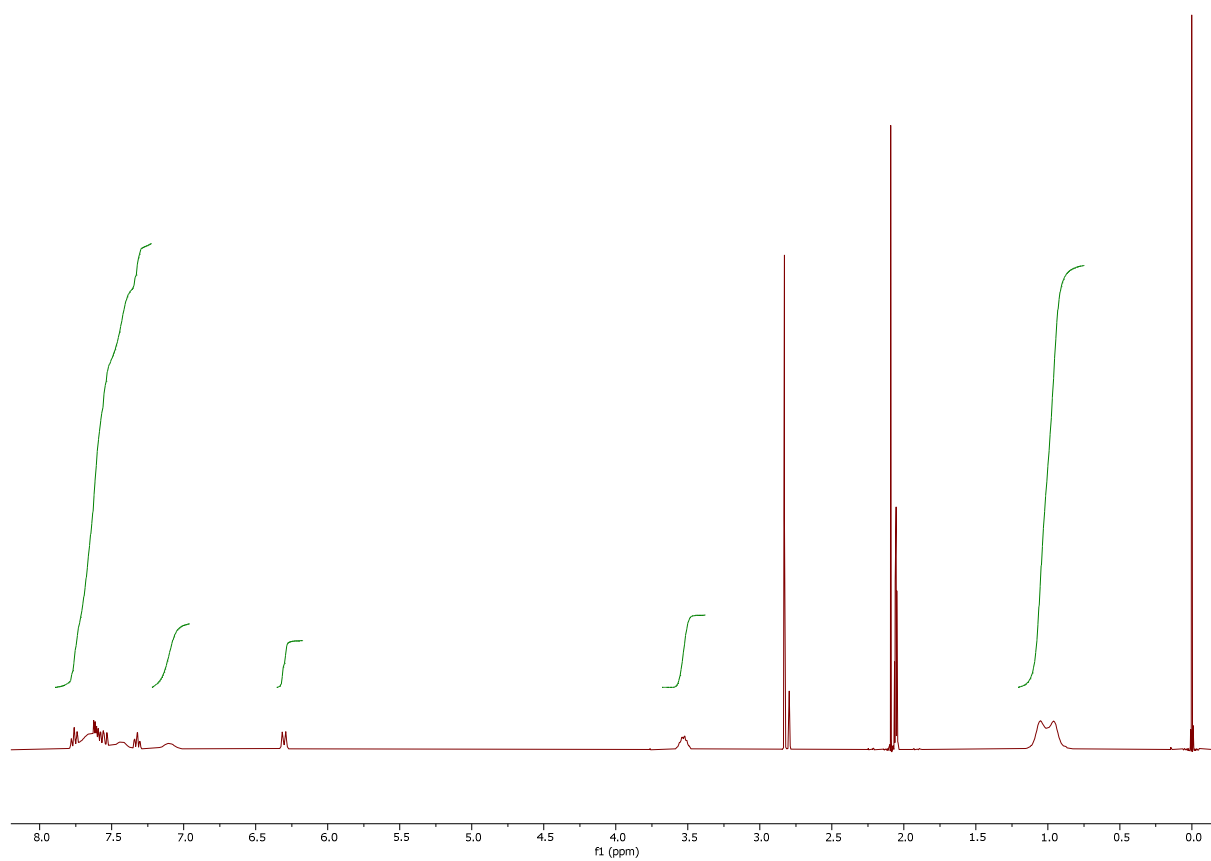

**Figure S46.**  $^1\text{H}$  NMR spectrum (acetone- $\text{d}_6$ , 400 MHz) of **9**

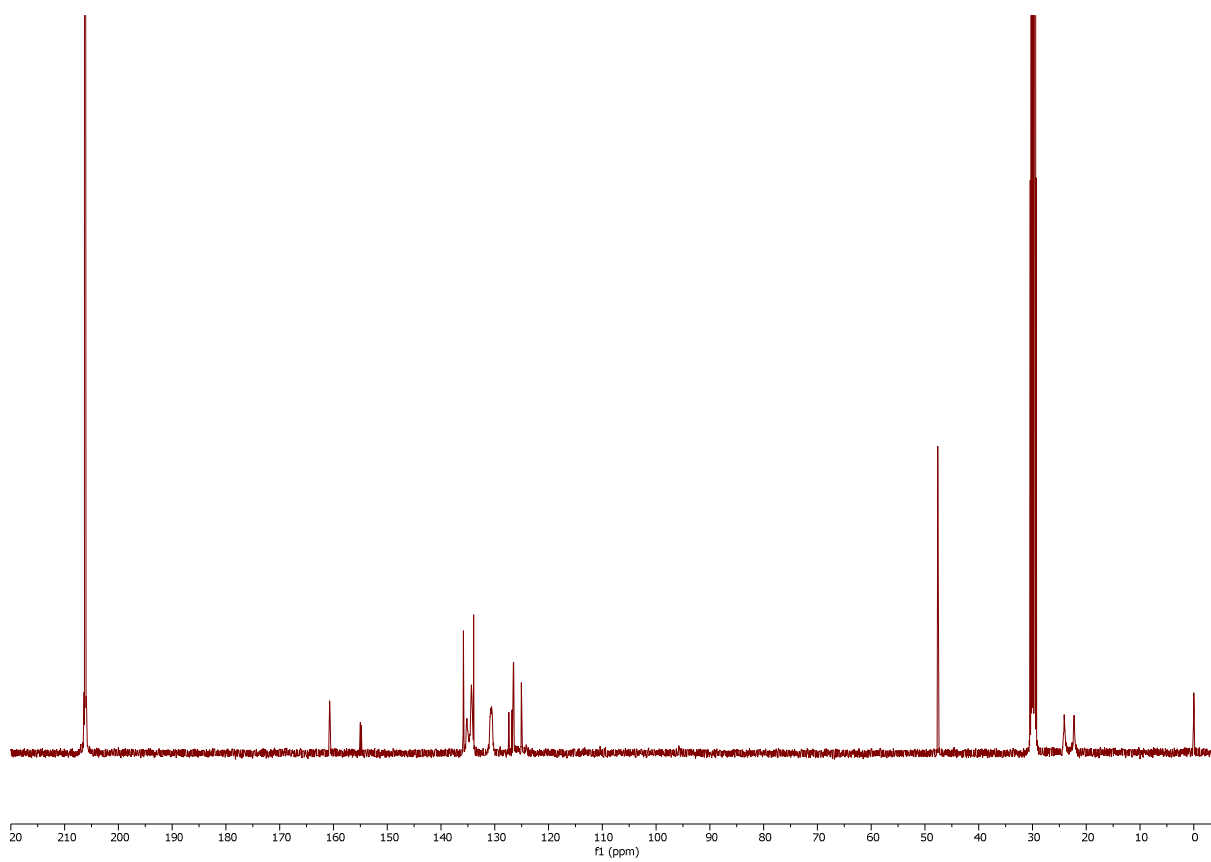

**Figure S47.**  $^{13}\text{C}\{^1\text{H}\}$  NMR spectrum (acetone- $\text{d}_6$  101 MHz) of **9**

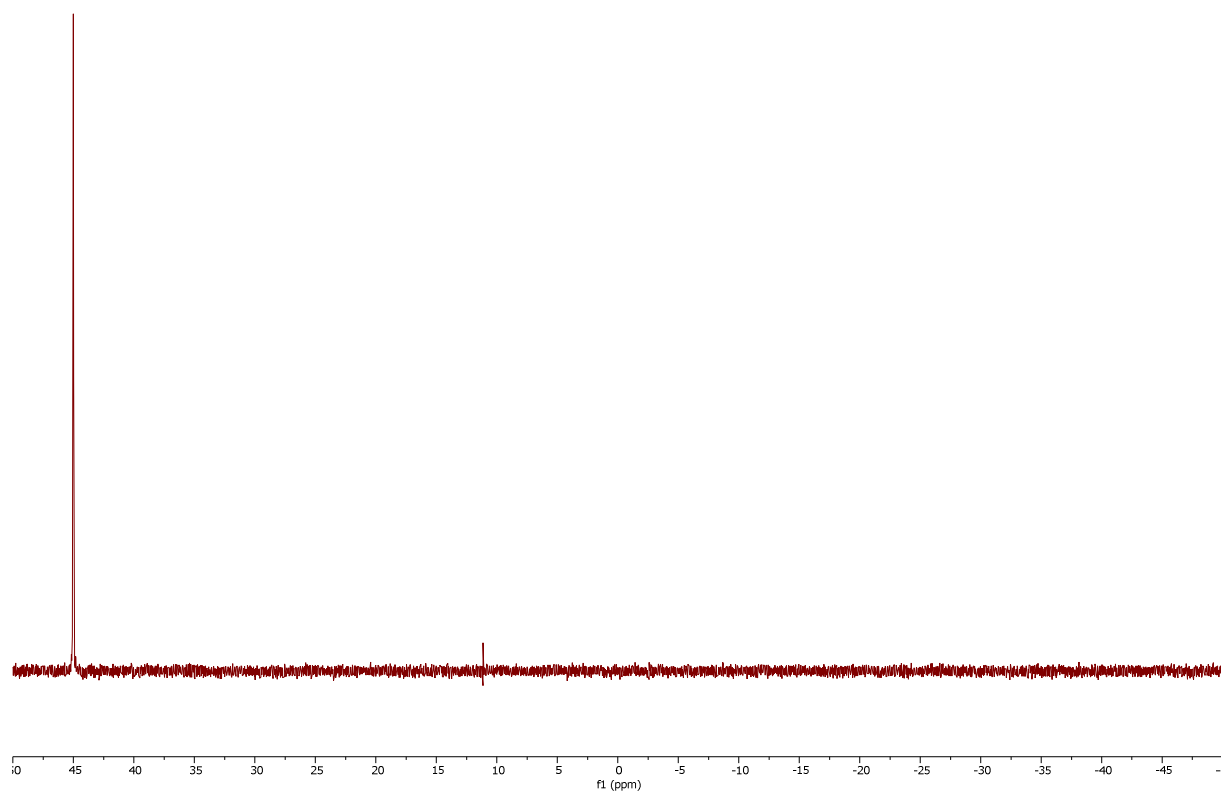

**Figure S48.**  $^{31}\text{P}\{^1\text{H}\}$  NMR spectrum (acetone- $\text{d}_6$ , 162 MHz) of **9**
